Nowotarski et al.

# The Planarian Anatomy Ontology: A resource to connect data within and across experimental platforms

Stephanie H. Nowotarski<sup>\*1,2</sup>, Erin L. Davies<sup>\*1,3</sup>, Sofia M. C. Robb<sup>\*1</sup>, Eric J. Ross<sup>1,2</sup>, Nicolas Matentzoglou<sup>4</sup>, Viraj Doddihal<sup>1</sup>, Mol Mir<sup>1</sup>, Melainia McClain<sup>1</sup>, Alejandro Sánchez Alvarado<sup>1,2,†</sup>

\* denotes equal contribution to work

## Author Affiliations:

- 1: Stowers Institute for Medical Research, Kansas City, MO, USA
- 2: Howard Hughes Medical Institute, Chevy Chase, MD, USA
- 3: Center for Cancer Research, National Cancer Institute, National Institutes of Health, Frederick, MD, USA
- 4: European Bioinformatics Institute (EMBL-EBI), European Molecular Biology Laboratory, Wellcome Genome Campus, Hinxton, Cambridge CB10 1SD, UK.

† **Corresponding Author:** [asa@stowers.org](mailto:asa@stowers.org)

Nowotarski et al.

## 1 **Running title**

2 Ontology of Planarian Anatomy

## 3 **Abstract**

4       As the planarian *Schmidtea mediterranea* (*Smed*) gains popularity as a research  
5 organism, the need for standard anatomical nomenclature is increasingly apparent. A  
6 controlled vocabulary streamlines data annotation, improves data organization, and  
7 enhances cross-platform and cross-species searchability. We created the Planarian  
8 Anatomy Ontology (PLANA), an extendable framework of defined *Smed* anatomical  
9 terms organized using relationships. The most current version contains over 800 terms  
10 that describe *Smed* anatomy from subcellular to system-level across all life cycle  
11 stages, in intact animals, and regenerating body fragments. Terms from other anatomy  
12 ontologies were imported into PLANA to promote ontology interoperability and  
13 comparative anatomy studies. To demonstrate the utility of PLANA for data curation, we  
14 created web-based resources for planarian embryogenesis, including a staging series  
15 and molecular fate mapping atlas, as well as a searchable Planarian Anatomy Gene  
16 Expression database, which integrates a variety of published gene expression data and  
17 allows retrieval of information of all published sequences associated with specific  
18 planarian anatomical regions. Finally, we report methods for continued curation of  
19 PLANA, providing a path for expansion and evolution of this community resource.

## 20 **Keywords**

21 planarian, ontology, anatomy, staging, embryogenesis, regeneration

## 22 **Summary Statement**

23 We report construction of an anatomy ontology for an emerging research organism and  
24 show its use to curate and mine data across multiple experimental platforms.

Nowotarski et al.

## 25 Introduction

26           Researchers using the free-living, freshwater planarian *Schmidtea mediterranea*  
27 (*Smed*) are rapidly generating genomic, transcriptomic, phenotypic, and anatomical  
28 data. However, the field has neither a standardized vocabulary nor a universally  
29 accepted set of gene/transcript models to allow for quick, reliable navigation and  
30 integration of data across experimental platforms and publications. *Smed* anatomical  
31 information has been garnered using techniques for structural and ultrastructural  
32 visualization (e.g., histological staining, scanning and transmission electron  
33 microscopy), as well as molecular techniques that report gene expression or protein  
34 localization *in situ* (e.g., whole-mount *in situ* hybridization, immunohistochemistry, and  
35 immunofluorescence). Gene discovery has been facilitated through sequenced *Smed*  
36 genome assemblies (Robb, Ross and Sánchez Alvarado, 2008; Robb *et al.*, 2015;  
37 Grohme *et al.*, 2018), and *de novo* assembled *Smed* transcriptomes (Adamidi *et al.*,  
38 2011; Sandmann *et al.*, 2011; Labbé *et al.*, 2012; Rouhana *et al.*, 2012; Srivastava *et al.*,  
39 2014; Tu *et al.*, 2015; Brandl *et al.*, 2016). Microarray analysis (Eisenhoffer, Kang  
40 and Sánchez Alvarado, 2008; Wagner, Ho and Reddien, 2012), bulk (Blythe *et al.*,  
41 2010; Solana *et al.*, 2012; Davies *et al.*, 2017) and single-cell RNA-Seq (Wurtzel *et al.*,  
42 2015; Fincher *et al.*, 2018; Plass *et al.*, 2018; Zeng *et al.*, 2018) identified cell type and  
43 tissue-enriched biomarkers, as well as candidate genes implicated in biological  
44 processes of interest for functional interrogation via whole-animal RNAi knock-down  
45 (Alvarado and Newmark 1999; Newmark *et al.* 2003; Reddien *et al.* 2005). Efficient  
46 integration and synthesis of this massive and expanding trove of visual, molecular, and  
47 functional data requires the adoption of universal standards, including a common  
48 anatomical vocabulary and syntax, and most importantly, a method of organization that  
49 allows data to be easily retrieved by any category.

50           Big data must be readable, reusable, and extensible by both humans and  
51 computers. Ontologies (Gruber and Others 1993) excel at this crosstalk, creating  
52 common understanding within a domain of knowledge by placing entities described in a  
53 controlled language in relationship to each other using either explicitly defined  
54 (asserted) or inferred statements. The resulting structure is a representation of

Nowotarski et al.

55 knowledge, readable by both humans and machines, that is able to retrieve both  
56 asserted and inferred axioms, i.e., a knowledge graph. This structure has made  
57 ontologies ubiquitous in the digital age, where frameworks such as the semantic web  
58 facilitate information sharing across automated systems. Codifying knowledge using an  
59 ontological framework also promotes sharing data according to FAIR (Findable,  
60 Accessible, Interoperable, and Reproducible) practices (Wilkinson *et al.*, 2016).

61 Ontology structures can be used to explore, understand and discover  
62 relationships among data and to develop testable hypotheses. A clear example of the  
63 usefulness of ontologies in the biological sciences is the Gene Ontology (GO). GO is a  
64 well-known, highly used framework that endeavors to ascribe putative functions to genes  
65 across species based on sequence homology, from the molecular to the organismal  
66 level (Ashburner *et al.*, 2000). The hierarchical organization in GO defined by  
67 relationships between terms facilitates refinement or expansion of candidate gene lists  
68 from gene expression studies. For example, a gene list associated with pigmentation  
69 can be refined by selecting a more granular category such as cellular pigmentation. GO  
70 also provides a first-pass analysis of molecular and cellular processes most likely to be  
71 enriched or perturbed between experimental samples. Additionally, data can be  
72 interrogated to inform if genes are assigned to multiple biological processes or other  
73 categories.

74 Anatomy ontologies are another example of the use of ontologies in biology and  
75 have been developed for many well-established and emerging research organisms,  
76 including slime molds (Gaudet *et al.*, 2008), nematodes (Lee and Sternberg, 2003), fruit  
77 flies (Costa *et al.*, 2013), frogs (Segerdell *et al.*, 2008), zebrafish (Van Slyke *et al.*,  
78 2014), mice (Hayamizu *et al.*, 2013), and humans (Bard, 2012). In addition to providing  
79 a controlled vocabulary and means of streamlining data annotation, these frameworks  
80 also facilitate comparative studies on animal development and evolution. One way this  
81 is accomplished is by making species-specific ontologies compatible and interoperable  
82 with Uberon, a cross-species gross anatomy ontology (Mungall *et al.*, 2012). The  
83 interoperability of ontologies enriches and extends navigation among disparate  
84 datasets. For example, it will soon be possible to identify evolutionarily conserved genes  
85 required for ciliogenesis, along with genes expressed in cilia, via searches that use GO,

Nowotarski et al.

86 Uberon, and species-specific anatomy and phenotype ontologies. To maximize the  
87 scientific utility and visibility of big data generated by the planarian research community,  
88 the field requires new bioinformatic tools, including ontologies, that will improve data  
89 archival practices and search functions across different experimental platforms. Here  
90 we debut the Planarian Anatomy Ontology (PLANA) and demonstrate its utility for data  
91 annotation and integration across 155 published data sets.

## 92 **Results**

### 93 **Annotating anatomical terms: Classes**

94 PLANA is an extendable framework of defined terms that aims to holistically  
95 describe *Smed* anatomy across all life cycle stages for the asexually and sexually  
96 reproducing biotypes. In order to ensure that PLANA encompasses all relevant  
97 anatomical *Smed* terms, we conducted a review of 200 primary research citations from  
98 2005 through 2019 (Table S1) and identified 658 terms pertaining to biotypes, life cycle  
99 stages, embryonic, adult and regenerating anatomical structures, subcellular  
100 components, cells, tissues, organs, anatomical systems, body regions, anatomical  
101 spaces (e.g., cavities and lumens), anatomical surfaces, boundaries, planes, and axes.  
102 380 of the 658 terms were synonymous (e.g., eye and photoreceptor) resulting in a final  
103 set of 278 terms commonly used by the planarian community. Hereafter, we call these  
104 terms classes. Each class has a primary name (label) and may have supporting  
105 synonym(s). In addition, classes were imported from other ontologies and composite  
106 classes (described below) were created. In all, PLANA version v2020-07-31 has a final  
107 class count of 855.

108 While a list of anatomical terms is useful, the strength of an ontology derives from  
109 the ability to annotate classes with metadata and to hierarchically organize classes into  
110 a relational network. Each class has its own set of categorical, spatial, temporal and  
111 developmental relationships to other classes (Figure 1). Following the convention set  
112 forth by (Van Slyke *et al.*, 2014), classes are represented using single quotation marks,  
113 and while their ID generally follows (e.g., 'epidermis' PLANA:0000034), we omit the ID  
114 for readability. All IDs for PLANA classes mentioned in the text are found in Table S2.

Nowotarski et al.

115 Each class was annotated with required information as follows: a singular name  
116 (label), e.g., ‘eye’, a unique identification number (ID), a definition, and the relevant  
117 reference(s) for the definition (Figure 2A). Optional annotations were also assigned to  
118 classes (Table 1), including synonyms, external ontology database identification  
119 numbers (dbxref) to facilitate comparative anatomy searches, and images depicting  
120 anatomical features, along with explanatory legends and references (Figure 2A).  
121 Together, all classes and their relationships comprise a large, self-organizing webwork  
122 (Figure 2B).

123 In order to extend the use of PLANA and promote interoperability with other  
124 ontologies, classes at the top of the Uberon anatomy ontology hierarchy (Mungall et al.  
125 2012) were imported directly into PLANA (e.g., ‘anatomical entity’ UBERON:0001062  
126 and ‘life cycle stage’ UBERON:0000105). For these imported classes, no annotation  
127 fields (e.g., ID) were altered and no additional annotations were added. Imported  
128 classes are subject to change when Uberon is updated. These imported classes  
129 frequently appear as nodes in the PLANA hierarchy (Figure 2B).

130 To facilitate comparative anatomy queries across species, additional classes  
131 from extant anatomy ontologies were imported and instantiated into PLANA whenever  
132 possible, including Uberon (Mungall *et al.*, 2012), the Common Anatomy Reference  
133 Ontology (CARO) (Haendel *et al.*, 2008), the Biological Spatial Ontology (BSPO)  
134 (Dahdul *et al.*, 2014), the Cell Ontology (CL) (Diehl *et al.*, 2016), and the Gene Ontology  
135 (GO) (Ashburner *et al.*, 2000; The Gene Ontology Consortium, 2019). For these  
136 instantiated classes, new PLANA IDs were assigned, and annotations were edited or  
137 added to reflect planarian-specific information. For example, the class ‘eye’  
138 UBERON:0000970 was given the ID PLANA:0000036 (the external ontology  
139 identification number was retained in the database cross-reference (dbxref) annotation  
140 field). ‘Eye’ PLANA:0000036 was annotated with planarian-specific information  
141 pertaining to its cellular origin, development, anatomical system, and anatomical  
142 location. Additional annotations that altered the original imported ‘eye’ class after  
143 instantiation included the incorporation of a representative image, as well as PubMed  
144 IDs for the use of ‘eye’ in planarian literature. Such class instantiation prevents

Nowotarski et al.

145 unsanctioned changes within PLANA when external ontologies are updated yet allows  
146 association with outside ontologies via the dbxref field.

### 147 **Synonym annotation**

148       Ontology interoperability and applications involving human input require PLANA  
149 to allow for variability in language. This variability is accommodated by annotating  
150 classes with synonyms. Synonyms make PLANA more flexible for users, enabling  
151 queries and searches to be more inclusive. When synonymous names were present in  
152 the publication record, class labels were assigned to the most commonly used term,  
153 and less frequently used names were annotated as synonyms. For example, ‘cephalic  
154 ganglia’ has the synonyms brain, cerebral ganglia, and bi-lobed brain. Classes may be  
155 annotated with multiple synonyms (Figure 2A). Exceptions to this rule include instances  
156 where classes were imported from another anatomy ontology and represented a broad  
157 comparative anatomical name. For example, ‘eye’ PLANA:0000036  
158 (UBERON:0000970) superseded the popular moniker photoreceptor as the class name  
159 in PLANA in order to strengthen cross-species comparisons. Popular names that lacked  
160 specificity were not used as class labels, e.g., ‘epidermis’ (the outermost epithelial  
161 covering of the animal) was selected as a class name rather than the often-used term  
162 epithelium, as there are many other epithelial tissues apart from the ‘epidermis’.

163

### 164 **Class definitions and references annotations**

165       In order to clarify both class structures and meaning for planarian biologists,  
166 comparative anatomists, and ontologists alike, each class has a written definition  
167 embedded with corresponding published reference(s) demonstrating the first use of the  
168 term in our literature search (def\_dbxref, Figure 2A, Table S2). Original external  
169 ontology ID(s) from instantiated classes are held in a dbxref annotation field. The dbxref  
170 field also contains PubMed identification numbers for articles from the literature search  
171 that contain that class (Figure 2A, Table S1). Taken together, the class definitions and  
172 database cross-references provide provenance and promote ontology interoperability.

173

### 174 **Prototypic imagery**

Nowotarski et al.

175 Through its definitions and links to publications, PLANA is inherently an  
176 educational resource. To increase PLANA's didactic potential, we appended images to  
177 classes using the optional "depiction" annotation field and added explanatory legends  
178 using the "comment" annotation field (Figure 2A). Over 200 classes in this release are  
179 accompanied by an archetypal image, either an illustration for spatial classes or an  
180 electron or light microscopy image for anatomical structures. This imagery augments  
181 the written class definition through clear visualization (Figure 2A).

182

### 183 **Composite classes**

184 During the literature survey to generate class names (Table S1), multi-word  
185 classes were included (e.g., 'photoreceptor neuron'). However, the need to create more  
186 specific terms became apparent (e.g., 'anterior photoreceptor neuron' and 'posterior  
187 photoreceptor neuron'). Moreover, it became clear that many classes could be created  
188 using an additive, formulaic approach already employed by other ontologies. Pre-  
189 composed, or composite classes (Mungall et al. 2010) were created using patterns that  
190 auto-generate a new class by combining two existing classes using Dead Simple OWL  
191 Design Patterns (DOSDP) (Osumi-Sutherland *et al.*, 2017) (Figure 3A). Composite  
192 definitions were auto-generated and may be overwritten by curators. Furthermore,  
193 composite classes may be used to generate new classes, providing a stereotypical way  
194 to generate terms with greater specificity (Figure 3A). Patterns used to make composite  
195 classes appear in Table S3. This automated addition of classes allows rapid expansion  
196 of more specific classes as the need for spatial and temporal granularity grows.

### 197 **Constructing a relational structure: relations and object properties**

198 An ontology's strength lies within its hierarchical structure, which is provided by a  
199 single baseline categorical relationship (*is a*) working together with more specific  
200 relational terms called object properties. This release of PLANA uses 14 object  
201 properties from the Relationship Ontology (RO) (Smith et al. 2005) which enable the  
202 construction of categorical, spatial, developmental, and temporal relationships between  
203 classes (Table 2). Following convention, object properties are herein formatted using  
204 lowercase lettering and the font `Courier New` (Van Slyke *et al.*, 2014). For example,



Nowotarski et al.

205 the ‘ventral nerve cord’ is `part of` the ‘central nervous system’. Some object  
206 properties have the feature of being transitive, meaning the property can be inherited by  
207 a subclass, or entailed through the hierarchy. To expand on the previous example,  
208 `part of` is transitive; therefore, since the ‘central nervous system’ is a ‘nervous  
209 system’ and the ‘ventral nerve cord’ has been asserted as being `part of` the ‘central  
210 nervous system’, ‘ventral nerve cord’ can also be inferred to be `part of` the ‘nervous  
211 system’ (Figure 3B).

212

### 213 **Baseline categorical relationship: is a**

214 The categorical “is a” relationship is the baseline relationship that sets up  
215 PLANA’s class: subclass (parent: child) structure, independent of other relationships  
216 conferred through object properties. Most classes are linked to at least one other class  
217 through an “is a” relationship (e.g., ‘ventral epidermis’ is a ‘epidermis’). The “is a”  
218 relationship forms parent-child relationships between terms. Broadly defined, parent  
219 classes occupy relatively higher-order positions in the hierarchy, while child terms are  
220 more specific. In the example above, ‘epidermis’ is the parent class and ‘ventral  
221 epidermis’ is the child class (Figure 3C). A class can have multiple parents, e.g., ‘sperm’  
222 is a ‘gamete’, and ‘sperm’ is a ‘male germ cell’.

223

### 224 **Scalar categorical relationship: part of**

225 The `part of` object property codifies scalar relationships from cell type to  
226 tissue, tissue to organ, organ to anatomical system, and anatomical system to the whole  
227 organism. Taken in one step of ‘class’ object property ‘class’, relationships are as  
228 simple as the earlier mentioned example: ‘ventral nerve cord’ `part of` ‘central  
229 nervous system’. Like many object properties used in PLANA, `part of` relationships  
230 are transitive (Table 1; Figure 3B). As previously mentioned, transitivity enables  
231 relationships to be inferred among terms when the ontology is queried. A more complex  
232 *explicitly* asserted example of the `part of` object property has many classes chained  
233 together: ‘intestinal phagocyte’ `part of` ‘gastrodermis’, ‘gastrodermis’ `part of` ‘gut’,  
234 ‘gut’ `part of` ‘digestive system’, and finally ‘digestive system’ `part of` ‘asexual  
235 organism’. Statements that leap steps in scale, like ‘intestinal phagocyte’ (cell) `part of`

Nowotarski et al.

236 'gut' (organ), and 'gastrodermis' (tissue) `part of` 'digestive system' (anatomical  
237 system) are *not explicitly* asserted in PLANA but *are inferred* and are true statements.  
238 Furthermore, inferred relationships may be made among statements constructed using  
239 different object properties. For example, 'central nervous system' is a 'nervous system'  
240 and the 'ventral nerve cord' `part of` 'central nervous system', thus 'ventral nerve cord'  
241 `part of` 'nervous system' is inferred (Figure 3B).

242

243 **Spatial relationships: contained in, anterior to, posterior to, immediately deep to,**  
244 **immediately superficial to, adjacent to**

245 PLANA has several object properties used to denote positional relationships  
246 among classes (Table 1). The `contained in` object property associates cell, tissue,  
247 organ, and anatomical systems with classes defining broad spatial domains of the intact  
248 embryo, juvenile, and adult body plans (Figure 4). Examples include 'embryonic  
249 pharynx' `contained in` 'oral hemisphere' (Figure 4A), and 'photoreceptor neuron'  
250 `contained in` 'anterior region', 'dorsal region', and 'head' (Figure 4C). For  
251 experimental data annotation, the `contained in` object property may also be used to  
252 associate classes with regions of regenerating adult asexual or hermaphrodite body  
253 fragments (e.g., 'blastema' `contained in` 'head fragment').

254 Spatial relationships along the anteroposterior axis are described using the  
255 `anterior to` and `posterior to` object properties. For example: 'head' `anterior`  
256 `to` 'prepharyngeal region'. Spatial relationships along the mediolateral axis are codified  
257 using the object properties `immediately deep to` and `immediately`  
258 `superficial to`. For example, 'epidermis' `immediately superficial to` 'basal  
259 lamina of the epithelium', and reciprocally, 'basal lamina of the epithelium'  
260 `immediately deep to` 'epidermis' (Figure 4D). Classes next to each other in the  
261 body, but not present in a fixed position relative to the anteroposterior, dorsoventral or  
262 mediolateral body axes, may be linked using the reciprocal `adjacent to` object  
263 property. In the proto-kidneys ('protonephridia') the asserted axiom 'collecting duct  
264 epithelial cell' `adjacent to` 'distal tubule epithelial cell' also results in a reciprocal

Nowotarski et al.

265 inferred axiom of ‘distal tubule epithelial cell’ adjacent to ‘collecting duct epithelial  
266 cell’ (Figure 4D)(Rink et al. 2011; Scimone et al. 2011).

267

268 **Temporal relationships: existence starts during or after, existence overlaps, and**  
269 **existence stops during or before**

270 Where known, temporal staging information was annotated for classes using the  
271 existence starts during or after, existence overlaps, and existence  
272 stops during or before object properties. For example, ‘embryonic pharynx’  
273 existence starts during or after ‘Stage 2’; ‘embryonic pharynx’ existence  
274 overlaps ‘Stage 2’, ‘Stage 3’, ‘Stage 4’, ‘Stage 5’, ‘Stage 6’; ‘embryonic pharynx’  
275 existence stops during or before ‘Stage 6’. The existence overlaps  
276 object property was applied to cell types, tissues, organs, and anatomical systems  
277 present in asexual adults and/or juvenile and adult hermaphrodites.

278

279 **Developmental relationship: develops from**

280 Developmental provenance, where known, was codified using the develops from  
281 object property. In planarians, lineages for all adult body cell types descend from a  
282 population of cycling adult pluripotent stem cells called neoblasts (Newmark and  
283 Sánchez Alvarado, 2000; Wagner, Wang and Reddien, 2011; Zeng *et al.*, 2018). As  
284 neoblasts commit to a cell-type specific differentiation program, they are thought to  
285 down-regulate expression of stem cell-enriched genes, exit the cell cycle, and  
286 concomitantly upregulate expression of lineage-promoting transcription factor(s) (Guo,  
287 Peters and Newmark, 2006; Scimone *et al.*, 2011; Wagner, Wang and Reddien, 2011;  
288 Shibata *et al.*, 2016; Zeng *et al.*, 2018). In PLANA, lineage trajectories are denoted  
289 unidirectionally, originating in the neoblast population and proceeding through one or  
290 more documented cell state transitions to a terminally differentiated cell type. A well-  
291 studied example, the epidermal lineage, is documented as follows: ‘Category 2 cell’  
292 develops from ‘zeta neoblast’, ‘Category 3 cell’ develops from ‘Category 2 cell’,  
293 ‘Category 4 cell’ develops from ‘Category 3 cell’, and ‘Category 5 cell’ develops from  
294 ‘Category 4 cell’ (Figure 5) (Eisenhoffer, Kang and Sánchez Alvarado, 2008; Pearson  
295 and Sánchez Alvarado, 2010; van Wolfswinkel, Wagner and Reddien, 2014; Tu *et al.*,

Nowotarski et al.

296 2015; Cheng *et al.*, 2018). ‘zeta neoblast’ and Category 2, 3, and 4 cells are all an  
297 ‘epidermal progenitor cell’, while Category 5 cells are a ‘terminally differentiated cell’.

298

## 299 **Checking the structure: Queries**

300 To ensure the veracity of asserted and inferred axioms, we systematically  
301 queried PLANA using the competency questions listed in Table S4. When a query  
302 return contained errors such as incorrect relationships between classes (e.g when  
303 ‘ovary nerve plexus’ `part of` ‘asexual adult’ was returned), asserted axioms were  
304 edited and/or added to correct the inferred error. This process was iterated until all  
305 returned classes were correct.

306

## 307 **Talking to other ontologies: interoperability**

308 Bespoke, field-specific ontological frameworks are useful for data organization  
309 but become extensible and more powerful when designed to work with other ontologies.  
310 Optimal interoperability between PLANA and other ontologies was achieved by  
311 importing higher-order parent classes from Uberon and instantiating classes from other  
312 ontologies, along with recording their original ID as a `dbxref` annotation.

313 Additional interoperability is built into composite classes, as classes from the  
314 BSPO (Dahdul *et al.*, 2014), GO (Ashburner *et al.*, 2000; The Gene Ontology  
315 Consortium, 2019), and the Phenotype and Trait Ontology (PATO)  
316 (<http://www.obofoundry.org/ontology/pato.html>) were imported into PLANA upon  
317 creation of composite classes. For example, GO terms for mitotic and meiotic cell cycle  
318 phases were imported to generate PLANA composite classes for stages of the neoblast  
319 cell cycle (e.g., S phase neoblast), the mitotic germ cell cycles (e.g., metaphase  
320 spermatogonia), and meiotic germ cell cycles (e.g., meiotic metaphase 1 stage  
321 spermatocyte) (Table S3).

322 While direct import and instantiated use of classes from other ontologies is  
323 important for interoperability, another equally fundamental means of ensuring that one  
324 ontology can talk to another is through limiting object properties to those referenced in  
325 the Relation Ontology (RO) (Smith et al. 2005). The RO is a reference set of relations  
326 and their semantics used for standardization across ontologies in the OBO Foundry

Nowotarski et al.

327 (Smith et al. 2007). Our strict use of RO object properties ensures that PLANA  
328 relationships are found in, and stated similarly, as in other ontologies. PLANA was  
329 constructed with an eye towards ontology interoperability, facilitating its application to  
330 evo-devo and comparative anatomy studies. Interoperability will also promote future  
331 extension and application of PLANA as a base framework for multiple types of data  
332 organization and will allow other ontology builds to use PLANA efficiently.

333

### 334 **Access PLANA**

335         Download the latest version of PLANA through the Open Biological and  
336 Biomedical Ontology (OBO) Foundry (<http://www.obofoundry.org/ontology/plana.html>)  
337 or the GitHub repository (<https://github.com/obophenotype/planaria-ontology>).

338

### 339 **View PLANA**

340         Browse PLANA on Planosphere: ([planosphere.stowers.org/anatomyontology](http://planosphere.stowers.org/anatomyontology)).  
341 Search the PLANA class glossary and link to class webpages  
342 (<https://planosphere.stowers.org/ontology>). Each class webpage contains the PLANA  
343 ID, definition and citation(s), and tools for visualizing annotated object property  
344 relationships and tables with planarian transcripts known to be expressed in each class  
345 (see below). The European Bioinformatics Institute (EMBL-EBI) Ontology Lookup  
346 Service (OLS) tree (<https://www.ebi.ac.uk/ols/ontologies/plana>) depicts hierarchical  
347 relationships among PLANA classes. An interactive feature, Ontology Graph,  
348 dynamically depicts user-selected relationship(s) for the class of interest in either cluster  
349 or hierarchical format and generates graphic files for download (Perez-Riverol *et al.*,  
350 2017).

351         WebVowl, ([visualdataweb.de/webvowl/#iri=http://purl.obolibrary.org/obo/plana.owl](http://visualdataweb.de/webvowl/#iri=http://purl.obolibrary.org/obo/plana.owl)  
352 ), an interactive ontology visualization tool, may also be used for exploration and  
353 graphical depictions of PLANA.

354

355

356

Nowotarski et al.

## 357 **PLANA in Action: organization of gene expression data**

358 As publications generate large amounts of data, there is an increasing need to  
359 make this data available and searchable in centralized locations. Planosphere is an  
360 online resource aggregator for published *Smed* datasets. We demonstrated PLANA's  
361 utility for organizing and mining large datasets by applying PLANA to the organization of  
362 an embryonic staging series and a molecular fate mapping atlas on Planosphere. Each  
363 PLANA class has its own web page on Planosphere, ensuring seamless integration of  
364 the PLANA hierarchy and class metadata into these resources (Figure 6A).

365

## 366 **Educational resources for planarian embryogenesis**

367 Planosphere hosts two tools powered by PLANA for exploring *Smed*  
368 embryogenesis: a staging series (<https://planosphere.stowers.org/staging>) and a  
369 molecular fate mapping atlas (<https://planosphere.stowers.org/atlas>) (Davies *et al.*,  
370 2017). The staging series defines and describes the eight stages of *Smed*  
371 embryogenesis, incorporating single embryo RNA-Seq gene expression data along with  
372 chronological and morphological information. The molecular fate mapping atlas  
373 documents cell and tissue types unique to early embryonic stages, as well as the  
374 development of adult anatomical systems. Published gene expression data from the  
375 single embryo RNA-Seq developmental time course and whole-mount *in situ*  
376 hybridization experiments on staged, wildtype embryos were annotated using PLANA.  
377 For the staging series, transcripts with enriched expression at each stage were  
378 annotated with relevant PLANA class(es) (Stage 2 - Stage 8). For the fate mapping  
379 atlas, PLANA classes for the biotype, life cycle stage(s), and anatomical structure(s)  
380 positive for expression were linked to transcripts (Figure 6B). Use of PLANA to curate  
381 gene expression data enables users to search by primary sequence, transcript  
382 identifier/name, developmental stage, and anatomical site(s) of expression, from cell  
383 type to anatomical system. Hyperlinks facilitate rapid navigation to transcript webpages  
384 (Transcript Pages) and PLANA class webpages (Figure 6C), enabling users to hone or  
385 broaden their queries, and to access relevant background information concerning  
386 embryo anatomy and development.

387

Nowotarski et al.

## 388 **Planarian Anatomy Gene Expression (PAGE)**

389 We used PLANA to create the Planarian Anatomy Gene Expression (PAGE)  
390 database, a web-based resource that allows users to mine published gene expression  
391 data using ontological inference and PLANA classes  
392 (<https://planosphere.stowers.org/search/page/about>; Figure 7A). Our PAGE web forms  
393 enable users to do complex searches by term, transcript, or publication that would  
394 traditionally involve extensive literature research and elaborate manual documentation.  
395 Tasks such as identifying all transcripts expressed, across transcriptomes and research  
396 laboratories, in any structure that is a part of the ‘central nervous system’, or all the  
397 structures a single transcript or a group of transcripts have been published as being  
398 expressed in, now takes seconds.

399 To generate the PAGE database we curated qualitative expression data from  
400 155 publications cited in the literature review (Table S1) to collect the following  
401 information: gene name(s), transcript identification number(s), Genbank accession  
402 number(s), PubMed identification number for the citation, evidence classes from the  
403 Evidence and Conclusion Ontology (ECO) (Chibucos *et al.*, 2017; Giglio *et al.*, 2019)  
404 (e.g., ‘colorimetric *in situ* hybridization evidence’, ‘fluorescence *in situ* hybridization  
405 evidence’, ‘RNA-sequencing evidence’, ‘single-cell RNA-sequencing evidence’ and  
406 ‘cDNA to DNA expression microarray’), PLANA class(es) describing anatomical site(s)  
407 of expression, and curator ORCID. In total, 88,870 instances of expression from  
408 wildtype, intact animals and sorted cell populations were manually curated in the PAGE  
409 database. Expression data in regenerating body fragments and in RNAi knock-down  
410 animals were not collected.

411 Because accessions and identifiers for annotations came from multiple  
412 transcriptomes and other sources like ESTs, we built a translation tool, Rosetta Stone  
413 Transcript Mapper, to map all sequences back to the smed\_20140614 reference  
414 transcriptome (<https://planosphere.stowers.org/search/rosettastone/blaze>; Suppl Figure  
415 1)(Tu *et al.*, 2015). Using Rosetta Stone Transcript Mapper, the 88,870 annotations  
416 referenced 30,715 unique accessions. Those accessions mapped to 16,657 transcripts  
417 in the reference transcriptome, which are associated with 15,513 gene models (Grohme  
418 *et al.* 2018). PAGE is searchable by any anatomical term in PLANA (including

Nowotarski et al.

419 synonyms), by transcript or accession number, and by publication. Using the PAGE  
420 resource, a researcher with a broad interest in transcripts annotated with a PLANA  
421 class that is contained in the ‘head’ would retrieve a downloadable list of 20,956  
422 instances of expression data from 123 different publications; spanning 7 life cycle  
423 stages; 5 types of evidence; 44 PLANA classes; 15 different published transcriptomes;  
424 and 8,944 unique reference transcripts, which are associated with 7,473 gene models  
425 (Figure 7B). Alternatively, a researcher with a narrow interest in a specific transcript  
426 looking for all papers with documentation of expression can search PAGE by transcript,  
427 such as “dd\_Smed\_v6\_76069\_0\_1”. This search returns a set of 6 homologs from 4  
428 different transcriptomes and 7 publications. All of the homologs are described as *ovo*  
429 and documented by 3 evidence types as being expressed in 6 anatomical structures in  
430 a sliding scale of specificity from ‘photoreceptor neuron’ to ‘eye cell’ to ‘head’ (Table  
431 S6). All of these classes are part of ‘eye’ and thus contained in ‘head’.

432

### 433 **PLANA in the Future: New Contributions and Versions**

434 PLANA is a living resource curated by the manuscript authors. New releases are  
435 automatically scheduled for weekly pick-up by Open Biological and Biomedical Ontology  
436 (OBO) Foundry (Table S5). PLANA will be versioned following substantive changes to  
437 the structure or monthly to pick up small changes. Queries (Table S3) will be performed  
438 for quality control prior to the release of each new version.

439 Members of the research community are encouraged to assist with PLANA  
440 curation through submission of a new class(es) and/or proposing edits to an existing  
441 class(es) using the GitHub issue tracker (<https://github.com/obophenotype/planaria-ontology/issues>). New class submissions require a class name, definition, PMID or DOI  
442 numbers for publication(s) referencing the definition, and a contact name and email  
443 address for the contributor. Two curators will review new classes and other proposed  
444 edits and will correspond with the contributor to resolve outstanding questions prior to  
445 updating PLANA. Bulk requests for new classes should be submitted using the  
446 spreadsheet template posted on the PLANA GitHub issue tracker.

447  
448 The PLANA GitHub repository issues page contains a searchable history of  
449 questions and resolutions to issues raised by curators and community members.



Nowotarski et al.

450 Questions may be submitted via opening a new issue to ensure the discussion and  
451 decision-making process is open, transparent, and archived. Requests to deprecate  
452 class(es) should be made by opening an issue. Obsolete classes remain visible in  
453 future versions of PLANA as deprecated classes. When a class is superseded by a new  
454 class, the deprecated class is listed as a synonym for the new class.

455

## 456 **Reporting**

457 PLANA is described according to the Minimum Information for the Reporting of  
458 an Ontology Guidelines (Matentzoglou *et al.*, 2018) (Table S7). PLANA is supported by  
459 the Sánchez Alvarado Lab at the Stowers Institute for Medical Research in Kansas City,  
460 Missouri, and data are licensed under a Creative Commons BY-NC 2.0 License. When  
461 using PLANA, please report the date(s) and/or version number(s) for the relevant  
462 PLANA files.

463

## 464 **Discussion**

465 The planarian research community is generating transcriptomic, genomic, and  
466 phenotypic data at an unprecedented rate that is already well past the limiting amount of  
467 raw material human brains can hold, let alone infer information from. While we use  
468 databases to tackle the problem of the information quantity, these databases cannot  
469 infer attributes based upon known relationships. To mimic what the human brain does  
470 so well (quickly infer relationships among categories that are made by binning according  
471 to properties), we created an ontology framework to organize and facilitate inferential  
472 searching of anatomy related data. We created the PLANA ontology to address three  
473 critical needs in our field: 1) a primer for researchers to become familiar with an  
474 emerging research organism, 2) a controlled anatomical vocabulary, and 3)  
475 standardization of data curation, thus promoting searchability within and among large  
476 data sets. As a set of living data, PLANA also provides a platform for growth and  
477 adaptation within the field. Additionally, the design and workflow used to construct  
478 PLANA provides a guide for creating anatomy ontologies for those who find themselves  
479 facing the same problem of exponential data growth.

Nowotarski et al.

480           Searchable through the OLS and Planosphere, PLANA is an educational  
481 resource that enables users to familiarize themselves with *Smed* anatomy, life cycle  
482 stages, prototypical images, and relevant publications. We provide an example of  
483 PLANA's utility and versatility as a data organization tool by using it to organize a  
484 staging series and fate mapping atlas for *Smed* embryogenesis. In addition, we created  
485 the PAGE community expression resource, a database that associates PLANA classes  
486 with an integrated reference for *Smed* transcripts and gene models that readily allows  
487 users to assess equivalency and make connections for spatial expression patterns and  
488 digital gene expression data produced across different platforms. We anticipate PLANA  
489 and the PAGE database will be used to assign cell or tissue identities to single-cell  
490 RNA-Seq cluster data. Using PAGE, it will be possible to quickly ascertain whether  
491 whole-mount *in situ* hybridization data has been reported for cluster-enriched  
492 biomarkers. By using PLANA and PAGE in conjunction with Seurat or UMAP-generated  
493 projections, predictive statements regarding anatomical identity may be made based on  
494 the proximity of cell clusters in expression space. In the near-term, PLANA is also being  
495 used to annotate high-resolution anatomical data from serial blockface scanning  
496 electron microscopy datasets.

497           As a standard for anatomical information, PLANA does not claim to be  
498 comprehensive or exact. On the contrary, we expect and welcome additions and  
499 curation from the greater scientific research community. Importantly, PLANA does not  
500 include processual, functional, or phenotypic information. PLANA does not encompass  
501 anatomy from planarian species other than *Smed*, but may be cloned, instantiated and  
502 edited to rapidly generate an anatomical ontology for other planarian species. PLANA  
503 will be instrumental to the construction and development of additional community  
504 resources, such as a planarian phenotype ontology. Notably, PLANA will facilitate the  
505 incorporation of a phenotype ontology into Upheno and Monarch (Shefchek *et al.*,  
506 2020), a semantic-based integrative data platform that connects expression and  
507 phenotypes with genotypes across species. Interoperability of PLANA with other  
508 anatomy ontologies, through Uberon, and of a *Smed* phenotype ontology with other  
509 phenotype ontologies, through Monarch, will facilitate comparative anatomy queries and  
510 cross-species genotypic and phenotypic comparisons.

Nowotarski et al.

## 511 **Materials and Methods**

### 512 **PLANA Construction**

513 PLANA content was amassed through the review of 200 publications (Table S1)  
514 to ensure comprehensive coverage of all anatomical entities reported by the planarian  
515 research community. Terms determined to be synonyms were annotated as “exact  
516 synonyms” rather than “broad synonyms” for clarity. All data were entered into shared  
517 Google spreadsheets. WebProtégé, because of its ease of use, and Google Docs  
518 because of its collaborative properties, were used with an initial draft version of the  
519 ontology to flesh out the underlying structure (Tudorache *et al.*, 2013). Where possible,  
520 extant classes were imported from other ontologies and instantiated in PLANA.

521 All tools used or generated for this manuscript that have a repository or a website  
522 are cataloged in Table S5. PLANA was initialized and is maintained with the use of the  
523 Ontology Development Kit (ODK; Table S5). ODK sets up the directory and file structure  
524 and provides scripts to manage and maintain an ontology. It integrates Dead Simple  
525 OWL Design Patterns (DOSDP)(Osumi-Sutherland *et al.*, 2017) for generating terms  
526 using patterns and ROBOT (Jackson *et al.* 2019) (Table S5) for handling imports from  
527 other ontologies, file format conversions, and validations. DOSDP uses yaml formatted  
528 patterns (Table S3) to generate similarly structured classes like, ‘testis cell’, ‘eye cell’,  
529 ‘pharynx neuron’, and ‘pharynx muscle cell’. These patterned terms were generated by  
530 combining two existing classes: an anatomical structure, e.g., ‘testis’, ‘eye’, ‘pharynx’,  
531 and a cell type e.g., ‘cell’, ‘neuron’, and ‘muscle cell’. Patterns may also specify that a  
532 class needs a name, definition, reference, and synonym. PLANA uses yaml patterns to  
533 manage all PLANA classes, dynamically pulling data from Google spreadsheets.

534 Protégé was used for visual inspection of the ontology and to query the PLANA  
535 structure (Musen and Protégé Team 2015). Queries were run using Protégé’s DL Query  
536 with the ELK 0.5.0 reasoner (Table S5) to ensure all terms are logically related and that  
537 no errant relationships were inferred after construction of our asserted hierarchy.

538

539

540

Nowotarski et al.

## 541 **Rosetta Stone Transcript Mapper**

542 The publications entered into the PAGE database (Table S1) used several  
543 different transcriptome and gene identifiers. In order to unify this dataset, it was  
544 necessary to map the various identifiers to each other. To create this map we selected  
545 10 transcriptomes available through Planmine (Rozanski *et al.*, 2019), *Schmidtea*  
546 *mediterranea* nucleotide sequences from the NCBI (NCBI Resource Coordinators,  
547 2016) and dd\_Smed\_v4 (an older version of the dd\_Smed\_v6 transcriptome available  
548 on Planmine)(Table S8). Sequences from all transcriptomes were aligned with blat (-  
549 minScore=100 -minIdentity=95) (Kent, 2002) to the most recent gene model transcripts  
550 (dd\_Smes\_v2) and to smed\_20140614 (Tu *et al.*, 2015). Aligned sequences were  
551 assigned to the corresponding gene models. Microarray probe sequences were aligned  
552 to reference sequences with blat (-minScore=30 -minIdentity=95) (Figure S1).

553 Some publications used different name formats even when using the same  
554 transcriptome. In order to address this complication, alternative transcript names were  
555 assigned (Table S9). NCBI protein accessions and names were assigned based on  
556 their corresponding NCBI nucleotide accession. Unigene identifiers from SmedGD  
557 (Robb, Ross and Sánchez Alvarado, 2008) were assigned based on their  
558 correspondence to dd\_Smed\_v4 identifiers, which were used in their construction.  
559 miRNAs were flagged based on sequence names and correspondence to mirBase  
560 (Griffiths-Jones, 2006; Kozomara, Birgaoanu and Griffiths-Jones, 2019). 34,864 of  
561 35,761 unique identifiers were mapped to the reference sequence database. We have  
562 named the database of mappings and the tools to look up various IDs the Rosetta  
563 Stone Transcript Mapper.

564

## 565 **PAGE Construction**

566 A web-based application for collecting planarian class annotations was built  
567 using R and Shiny (Bunn A 2013; Chang et al. 2017). R package ontologyX (Greene,  
568 Richardson and Turro, 2017) was used for traversing the ontology tree. R packages  
569 jsonlite (Ooms, 2014) and tidyverse (Wickham *et al.*, 2019) were used for data  
570 manipulation (Table S5).

Nowotarski et al.

571 Publications (Table S1) were split among 3 curators to document accession  
572 numbers of transcripts and to associate expression data with PLANA anatomical  
573 structure classes. Care was taken to use anatomical terms or synonyms from the  
574 description provided in the text. Where text description was not provided or a term was  
575 not found in the ontology, the term was either added as a class or a synonym or  
576 curators picked the most relevant term present in PLANA. For example, PLANA does  
577 not contain “Cathepsin positive cell” as it is currently unclear what the exact physical  
578 anatomical structure corresponding to this state is, but as these cells are located in the  
579 parenchyma we designated all mentions of “Cathepsin positive cells” as ‘parenchymal  
580 cell’ (PLANA:30003116)(Fincher et al. 2018). For all digital expression data we relied on  
581 the decisions of the authors as to cutoff and enrichment.

582 Annotations were reviewed, typos identified and corrected, sequence IDs  
583 manually assigned if not computationally identifiable from the manuscript text, and all  
584 sequences mapped using the Rosetta Stone Transcript Mapper (Table S5). Sequence  
585 descriptions for the reference sequences and gene models were assigned. For  
586 smed\_20140614, priority was given to Genbank descriptions (Benson et al. 2005). If  
587 Genbank descriptions were not available they were generated using AHRD (Table S5).  
588 Descriptions for dd\_Smes\_v2 transcripts and gene models were downloaded from  
589 Planmine using the intermine query builder (Rozanski et al. 2019).

590 The annotations, mappings, and sequence descriptions were organized into a  
591 triple store (Dingley 2003)(Table S5) and converted to turtle formatted files (ttl). The  
592 triple store was structured using Open Biomedical Association (OBAN) principles  
593 (Sarntivijai et al. 2016). The ttl files (annotations, mappings, descriptions), along with the  
594 PLANA ontology, Evidence and Conclusion Ontology (ECO) (Chibucos et al. 2017) owl  
595 files were loaded into a blazegraph datafile(Table S5), or journal (jnl) using blazegraph-  
596 runner(Table S5). We have Blazegraph running in a Docker (Merkel 2014) container  
597 that is web accessible to our planosphere web server. The Docker file was based on the  
598 lyrasis/blazegraph docker file (Table S5). Modifications were made to import our PAGE  
599 specific jnl and to change the name of our blazegraph instance to PAGE.

600 The PAGE webform searches generate SPARQL queries (SPARQL 1.1 Query  
601 Language ) from the user input data. To ensure that users can only input a PLANA

Nowotarski et al.

602 term, a modified version of the OLS autocomplete widget was used (Table S5). To allow  
603 SPARQL queries to incorporate the transitivity of the PLANA Ontology hierarchy and  
604 relationships using the ELK reasoner, we also run phenoscape/owlery (Table S5)  
605 through our customized docker container planosphere/owlery-plana (Table S5). Owlery  
606 is a collection of REST web services that enable querying with an OWL reasoner and a  
607 configured set of ontologies (Table S5). Through Owlery, a SPARQL query generated  
608 from our PAGE web form which asks to find all transcripts annotated as being  
609 expressed in the 'nervous system' (asserted) is expanded to include its transitive  
610 relation classes like 'central nervous system' and 'peripheral nervous system' (inferred)  
611 and also generates a new SPARQL query. This second SPARQL query is then used to  
612 query the jnl housed in our Blazegraph server.

613

## 614 **Animals and Imagery**

615 *Smed* anatomical descriptions were based on CIW-4 asexual and sexual adults  
616 (Newmark and Sánchez Alvarado 2002). Illustrations were made using Procreate  
617 (<https://procreate.art/>) and Adobe Illustrator  
618 (<https://www.adobe.com/products/illustrator.html>). Hematoxylin and eosin (H+E) stained  
619 histological sections were prepared for CIW-4 asexual adults (Adler *et al.*, 2014) and  
620 embryos (Davies *et al.*, 2017), and images were acquired on a Olympus America Slide  
621 Scanner. Many prototypical images were produced from TEM, STEM, and SBF-SEM  
622 datasets of C4 asexual animals. Images were acquired on a Zeiss Merlin SEM with a  
623 STEM detector and Gatan 3View 2XP, or a Thermo Fisher Scientific/FEI Tecnai G2  
624 Spirit BioTWIN with Gatan UltraScan 1000 CCD camera. For TEM and STEM imaging  
625 animals were prepared as in Cheng *et al.* (2018). For SBF-SEM animals were fixed as  
626 for STEM samples with *en bloc* staining steps per (Tapia *et al.*, 2012; Hua, Laserstein  
627 and Helmstaedter, 2015) as follows: reduced osmium incubation was performed  
628 overnight at 4 C, TCH incubation at 40 C for 45 minutes, incubation in 1% UA overnight  
629 at 4 C and transferred to 50 C for 2 hours, and lead acetate incubation for 2 hours at 50  
630 C. Animals then were dehydrated and infiltrated as for the STEM samples using either a  
631 hard formulation of Spurr's resin (EMS) or Hard Plus resin (EMS). Fiji (Schindelin *et al.*,

Nowotarski et al.

632 2012) was used for final adjustments and bilinear downsizing to the max dimension of  
633 512.

## 634 **Accession Numbers**

635 Accession numbers of transcriptomes, microarrays and additional resources  
636 used to construct the Rosetta Stone Transcript Mapper and PAGE resource can be  
637 found in Table S5. In addition, we downloaded every *Schmidtea mediterranea*  
638 sequence in the NCBI Genbank (Benson et al. 2005) nucleotide database on January  
639 23, 2020.

## 640 **Acknowledgments**

641 We thank Matthew Horridge and the whole Protégé course at the Stanford  
642 Center for Bioinformatics Research, Jim Balhoff for assistance with Owlery and  
643 Blazegraph, Andrew Koebbe for help with Blazegraph Docker, Mary Penne Mays for  
644 help with webform CSS and Dustin Dietz for system administration tasks. We would  
645 also like to thank Alice Accorsi, Blair Benham-Pyle, Biff Mann, and Aubrey Kent for  
646 insightful comments on the manuscript. Additional thanks to the SIMR Histology Core  
647 for slide sections and H+E staining, and to the SIMR Microscopy Core for scope training  
648 and slide scanner workflows.

## 649 **Competing Interests**

650 The authors declare no competing interests.

## 651 **Funding**

652 This work was conducted using the Protégé resource, which is supported by grant  
653 GM10331601 from the NIGMS. We also acknowledge funding from NIH Grant  
654 R37GM057260 to ASA, the Stowers Institute for Medical Research and the Howard  
655 Hughes Medical Institute.

656

Nowotarski et al.

## Data Availability

|                                                                                                      |                                                                                                                   |
|------------------------------------------------------------------------------------------------------|-------------------------------------------------------------------------------------------------------------------|
| PLANA<br><i>At the time of publication: PLANA Release 2020-07-31</i><br>(DOI:10.5281/zenodo.3969051) | <a href="https://github.com/obophenotype/planaria-ontology">https://github.com/obophenotype/planaria-ontology</a> |
| PAGE curations and codebase                                                                          | <a href="https://github.com/planosphere/PAGE">https://github.com/planosphere/PAGE</a>                             |
| Rosetta Stone Transcript Mapper                                                                      | <a href="https://github.com/planosphere/RosettaStone">https://github.com/planosphere/RosettaStone</a>             |
| Code for PAGE on Planosphere                                                                         | <a href="https://github.com/planosphere">https://github.com/planosphere</a>                                       |

All links to developed or referenced repositories are available in Supplemental Table 5. Original data underlying this manuscript can be accessed from the Stowers Original Data Repository at <http://www.stowers.org/research/publications/libpb-1530>.

## References

- Adamidi, C. *et al.* (2011) 'De novo assembly and validation of planaria transcriptome by massive parallel sequencing and shotgun proteomics', *Genome research*, 21(7), pp. 1193–1200
- Adler, C. E. *et al.* (2014) 'Selective amputation of the pharynx identifies a FoxA-dependent regeneration program in planaria', *eLife*, 3, p. e02238
- Arnold, C. P. *et al.* (2019) 'Wnt and TGF $\beta$  coordinate growth and patterning to regulate size-dependent behaviour', *Nature*, 572(7771), pp. 655–659
- Ashburner, M. *et al.* (2000) 'Gene ontology: tool for the unification of biology. The Gene Ontology Consortium', *Nature genetics*, 25(1), pp. 25–29
- Bard, J. (2012) 'A new ontology (structured hierarchy) of human developmental anatomy for the first 7 weeks (Carnegie stages 1-20)', *Journal of anatomy*, 221(5), pp. 406–416



Nowotarski et al.

Blythe, M. J. *et al.* (2010) 'A dual platform approach to transcript discovery for the planarian *Schmidtea mediterranea* to establish RNAseq for stem cell and regeneration biology', *PloS one*, 5(12), p. e15617

Brandl, H. *et al.* (2016) 'PlanMine--a mineable resource of planarian biology and biodiversity', *Nucleic acids research*. Oxford University Press, 44(D1), pp. D764–D773

Chang, W. *et al.* (2017) 'Shiny: web application framework for R', *R package version*, 1(5)

Cheng, L.-C. *et al.* (2018) 'Cellular, ultrastructural and molecular analyses of epidermal cell development in the planarian *Schmidtea mediterranea*', *Developmental biology*, 433(2), pp. 357–373

Chibucos, M. C. *et al.* (2017) 'The Evidence and Conclusion Ontology (ECO): Supporting GO Annotations', *Methods in molecular biology*, 1446, pp. 245–259

Costa, M. *et al.* (2013) 'The *Drosophila* anatomy ontology', *Journal of biomedical semantics*, 4(1), p. 32

Dahdul, W. M. *et al.* (2014) 'Nose to tail, roots to shoots: spatial descriptors for phenotypic diversity in the Biological Spatial Ontology', *Journal of biomedical semantics*, 5, p. 34

Davies, E. L. *et al.* (2017) 'Embryonic origin of adult stem cells required for tissue homeostasis and regeneration', *eLife*, 6. doi: 10.7554/eLife.21052

Diehl, A. D. *et al.* (2016) 'The Cell Ontology 2016: enhanced content, modularization, and ontology interoperability', *Journal of biomedical semantics*, 7(1), p. 44

Eisenhoffer, G. T., Kang, H. and Sánchez Alvarado, A. (2008) 'Molecular analysis of stem cells and their descendants during cell turnover and regeneration in the planarian *Schmidtea mediterranea*', *Cell stem cell*, 3(3), pp. 327–339

Nowotarski et al.

Fincher, C. T. *et al.* (2018) 'Cell type transcriptome atlas for the planarian *Schmidtea mediterranea*', *Science*, 360(6391). doi: 10.1126/science.aag1736

Fu, L. *et al.* (2012) 'CD-HIT: accelerated for clustering the next-generation sequencing data', *Bioinformatics* . academic.oup.com, 28(23), pp. 3150–3152

Gaudet, P. *et al.* (2008) 'An anatomy ontology to represent biological knowledge in *Dictyostelium discoideum*', *BMC genomics*. Springer, 9, p. 130

Giglio, M. *et al.* (2019) 'ECO, the Evidence & Conclusion Ontology: community standard for evidence information', *Nucleic acids research*, 47(D1), pp. D1186–D1194

Greene, D., Richardson, S. and Turro, E. (2017) 'ontologyX: a suite of R packages for working with ontological data', *Bioinformatics* . academic.oup.com, 33(7), pp. 1104–1106

Griffiths-Jones, S. (2006) 'miRBase: the microRNA sequence database', *Methods in molecular biology* . Springer, 342, pp. 129–138

Grohme, M. A. *et al.* (2018) 'The genome of *Schmidtea mediterranea* and the evolution of core cellular mechanisms', *Nature*, 554(7690), pp. 56–61

Guo, L. *et al.* (2016) 'Widespread maintenance of genome heterozygosity in *Schmidtea mediterranea*', *Nature ecology & evolution*, 1(1), p. 19

Guo, T., Peters, A. H. F. M. and Newmark, P. A. (2006) 'A Bruno-like gene is required for stem cell maintenance in planarians', *Developmental cell*, 11(2), pp. 159–169

Haendel, M. A. *et al.* (2008) 'CARO – The Common Anatomy Reference Ontology', *Anatomy Ontologies for Bioinformatics*, pp. 327–349. doi: 10.1007/978-1-84628-885-2\_16

Hayamizu, T. F. *et al.* (2013) 'EMAP/EMAPA ontology of mouse developmental anatomy: 2013 update', *Journal of biomedical semantics*, 4(1), p. 15

Nowotarski et al.

Hua, Y., Laserstein, P. and Helmstaedter, M. (2015) 'Large-volume en-bloc staining for electron microscopy-based connectomics', *Nature communications*, 6, p. 7923

Kent, W. J. (2002) 'BLAT—the BLAST-like alignment tool', *Genome research*. genome.cshlp.org. Available at: <http://genome.cshlp.org/content/12/4/656.short>

Kozomara, A., Birgaoanu, M. and Griffiths-Jones, S. (2019) 'miRBase: from microRNA sequences to function', *Nucleic acids research*. Oxford University Press, 47(D1), pp. D155–D162

Labbé, R. M. *et al.* (2012) 'A comparative transcriptomic analysis reveals conserved features of stem cell pluripotency in planarians and mammals', *Stem cells*, 30(8), pp. 1734–1745

Lee, R. Y. N. and Sternberg, P. W. (2003) 'Building a cell and anatomy ontology of *Caenorhabditis elegans*', *Comparative and functional genomics*. hindawi.com, 4(1), pp. 121–126

Li, W. and Godzik, A. (2006) 'Cd-hit: a fast program for clustering and comparing large sets of protein or nucleotide sequences', *Bioinformatics* . academic.oup.com, 22(13), pp. 1658–1659

Matentzoglou, N. *et al.* (2018) 'MIRO: guidelines for minimum information for the reporting of an ontology', *Journal of biomedical semantics*, 9(1), p. 6

Mungall, C. J. *et al.* (2012) 'Uberon, an integrative multi-species anatomy ontology', *Genome biology*, 13(1), p. R5

NCBI Resource Coordinators (2016) 'Database resources of the National Center for Biotechnology Information', *Nucleic acids research*. ncbi.nlm.nih.gov, 44(D1), pp. D7–19

Newmark, P. A. *et al.* (2003) 'Ingestion of bacterially expressed double-stranded RNA inhibits gene expression in planarians', *Proceedings of the National Academy of Sciences of the United States of America*, 100 Suppl 1, pp. 11861–11865

Nowotarski et al.

Newmark, P. A. and Sánchez Alvarado, A. (2000) 'Bromodeoxyuridine specifically labels the regenerative stem cells of planarians', *Developmental biology*, 220(2), pp. 142–153

Newmark, P. A. and Sánchez Alvarado, A. (2002) 'Not your father's planarian: a classic model enters the era of functional genomics', *Nature reviews. Genetics*, 3(3), pp. 210–219

Newmark, P. A., Wang, Y. and Chong, T. (2008) 'Germ cell specification and regeneration in planarians', *Cold Spring Harbor symposia on quantitative biology*, 73, pp. 573–581

Ooms, J. (2014) 'The jsonlite Package: A Practical and Consistent Mapping Between JSON Data and R Objects', *arXiv [stat.CO]*. Available at: <http://arxiv.org/abs/1403.2805>

Osumi-Sutherland, D. et al. (2017) 'Dead simple OWL design patterns', *Journal of biomedical semantics*, 8(1), p. 18

Pearson, B. J. and Sánchez Alvarado, A. (2010) 'A planarian p53 homolog regulates proliferation and self-renewal in adult stem cell lineages', *Development*, 137(2), pp. 213–221

Perez-Riverol, Y. et al. (2017) 'OLS Client and OLS Dialog: Open Source Tools to Annotate Public Omics Datasets', *Proteomics*, 17(19). doi: 10.1002/pmic.201700244

Plass, M. et al. (2018) 'Cell type atlas and lineage tree of a whole complex animal by single-cell transcriptomics', *Science*, 360(6391). doi: 10.1126/science.aaq1723

Reddien, P. W. et al. (2005) 'Identification of genes needed for regeneration, stem cell function, and tissue homeostasis by systematic gene perturbation in planaria', *Developmental cell*, 8(5), pp. 635–649

Robb, S. M. C. et al. (2015) 'SmedGD 2.0: The Schmidtea mediterranea genome database', *Genesis*, 53(8), pp. 535–546

Nowotarski et al.

Robb, S. M. C., Ross, E. and Sánchez Alvarado, A. (2008) 'SmedGD: the Schmidtea mediterranea genome database', *Nucleic acids research*, 36(Database issue), pp. D599–606

Rouhana, L. *et al.* (2012) 'PRMT5 and the role of symmetrical dimethylarginine in chromatoid bodies of planarian stem cells', *Development*, 139(6), pp. 1083–1094

Rozanski, A. *et al.* (2019) 'PlanMine 3.0-improvements to a mineable resource of flatworm biology and biodiversity', *Nucleic acids research*, 47(D1), pp. D812–D820

Sandmann, T. *et al.* (2011) 'The head-regeneration transcriptome of the planarian Schmidtea mediterranea', *Genome biology*, 12(8), p. R76

Schindelin, J. *et al.* (2012) 'Fiji: an open-source platform for biological-image analysis', *Nature methods*. nature.com, 9(7), pp. 676–682

Scimone, M. L. *et al.* (2011) 'A regulatory program for excretory system regeneration in planarians', *Development*, 138(20), pp. 4387–4398

Segerdell, E. *et al.* (2008) 'An ontology for Xenopus anatomy and development', *BMC developmental biology*, 8, p. 92

Shefchek, K. A. *et al.* (2020) 'The Monarch Initiative in 2019: an integrative data and analytic platform connecting phenotypes to genotypes across species', *Nucleic acids research*, 48(D1), pp. D704–D715

Shibata, N. *et al.* (2016) 'Inheritance of a Nuclear PIWI from Pluripotent Stem Cells by Somatic Descendants Ensures Differentiation by Silencing Transposons in Planarian', *Developmental cell*, 37(3), pp. 226–237

Solana, J. *et al.* (2012) 'Defining the molecular profile of planarian pluripotent stem cells using a combinatorial RNAseq, RNA interference and irradiation approach', *Genome biology*, 13(3), p. R19

Nowotarski et al.

Srivastava, M. *et al.* (2014) 'Whole-body acoel regeneration is controlled by Wnt and Bmp-Admp signaling', *Current biology: CB*, 24(10), pp. 1107–1113

Tapia, J. C. *et al.* (2012) 'High-contrast en bloc staining of neuronal tissue for field emission scanning electron microscopy', *Nature protocols*, 7(2), pp. 193–206

Team, R. C. and Others (2013) 'R: A language and environment for statistical computing'. Vienna, Austria. Available at:

<https://repo.bppt.go.id/cran/web/packages/dplR/vignettes/intro-dplR.pdf>

The Gene Ontology Consortium (2019) 'The Gene Ontology Resource: 20 years and still GOing strong', *Nucleic acids research*, 47(D1), pp. D330–D338

Tudorache, T. *et al.* (2013) 'WebProtégé: A Collaborative Ontology Editor and Knowledge Acquisition Tool for the Web', *Semantic web*, 4(1), pp. 89–99

Tu, K. C. *et al.* (2015) 'Egr-5 is a post-mitotic regulator of planarian epidermal differentiation', *eLife*, 4, p. e10501

Van Slyke, C. E. *et al.* (2014) 'The zebrafish anatomy and stage ontologies: representing the anatomy and development of *Danio rerio*', *Journal of biomedical semantics*, 5(1), p. 12

Wagner, D. E., Ho, J. J. and Reddien, P. W. (2012) 'Genetic regulators of a pluripotent adult stem cell system in planarians identified by RNAi and clonal analysis', *Cell stem cell*, 10(3), pp. 299–311

Wagner, D. E., Wang, I. E. and Reddien, P. W. (2011) 'Clonogenic neoblasts are pluripotent adult stem cells that underlie planarian regeneration', *Science*, 332(6031), pp. 811–816

Wang, Y. *et al.* (2007) 'nanos function is essential for development and regeneration of planarian germ cells', *Proceedings of the National Academy of Sciences of the United States of America*, 104(14), pp. 5901–5906

Nowotarski et al.

Washington, N. L. *et al.* (2009) 'Linking human diseases to animal models using ontology-based phenotype annotation', *PLoS biology*, 7(11), p. e1000247

Wickham, H. *et al.* (2019) 'Welcome to the Tidyverse', *Journal of Open Source Software*, 4(43), p. 1686

Wilkinson, M. D. *et al.* (2016) 'The FAIR Guiding Principles for scientific data management and stewardship', *Scientific data*, 3, p. 160018

van Wolfswinkel, J. C., Wagner, D. E. and Reddien, P. W. (2014) 'Single-cell analysis reveals functionally distinct classes within the planarian stem cell compartment', *Cell stem cell*, 15(3), pp. 326–339

Wurtzel, O. *et al.* (2015) 'A Generic and Cell-Type-Specific Wound Response Precedes Regeneration in Planarians', *Developmental cell*, 35(5), pp. 632–645

Zeng, A. *et al.* (2018) 'Prospectively Isolated Tetraspanin+ Neoblasts Are Adult Pluripotent Stem Cells Underlying Planaria Regeneration', *Cell*, 173(7), pp. 1593–1608.e20A

Nowotarski et al.

## 837 **Figure Legends**

838 **Figure 1: PLANA classes are linked to one another through relationship terms.**

839 The anatomical class ‘Circular muscle cell’ is shown in relation to other PLANA  
840 classes. Different colors reflect the different types of relationships between the classes.  
841 Relationships shown are: is a (blue), part of (yellow), develops from (lavender),  
842 existence overlaps (aqua), and contained in (green).

843 **Figure 2: PLANA class annotation fields and structure.** A) An example of required  
844 (blue outlines) and optional annotations for the class ‘epidermis’. B) WebVowl  
845 visualization of PLANA structure. Each class is represented by a dark blue point. The  
846 proximity between classes is a metric of similarity and relationships between classes  
847 (object property-based axioms). Clusters of classes are noted with their categories.

848

849 **Figure 3: Creation of new classes using patterning algorithms and relationship.**

850 A) Composite classes, e.g., ‘tail fragment’ PLANA:0003602, generated by patterning  
851 algorithms, may be used to create new classes with greater specificity, e.g., ‘anterior  
852 region of tail fragment’ PLANA:0003710. B) Object property transitivity allows  
853 relationships to be inferred indirectly, across multiple layers of the PLANA hierarchy.  
854 Solid arrows are asserted axioms in PLANA, while the dashed arrow is an inferred  
855 relationship. C) Relationship hierarchy for the dorsal epidermis and ventral epidermis  
856 classes through the “is a” relationship.

857

858 **Figure 4: Codifying spatial relationships using the contained in object property.**

859 *Smed* embryonic (A) and adult (B) body plans. A) The ‘embryonic pharynx’ (red  
860 arrowhead) is `contained in` the ‘oral hemisphere’ of ‘Stage 3’, ‘Stage 4’ and ‘Stage 5’  
861 *Smed* embryos. B) The body region classed for the ‘adult hermaphrodite’ and ‘asexual  
862 adult’. C) ‘photoreceptor neuron’ (red arrowheads) is `contained in` the ‘anterior  
863 region’, the ‘dorsal region’ and the ‘head’. Gray box denotes epidermal and  
864 subepidermal region depicted in D) where the ‘epidermis’ is `immediately`  
865 `superficial to` the ‘basal lamina of the epidermis’ which is in turn `immediately`



Nowotarski et al.

866 deep to the ‘epidermis’. Another spatial relationship is that the ‘collecting duct  
867 epithelial cell’ and ‘distal tubule epithelial cell’ are adjacent to each other.

868

869 **Figure 5: Ontogeny is recorded using the develops from object property.**

870 Schematic showing both the “is a” relationship and develops from object property  
871 charting a proposed lineage trajectory for the epidermal lineage, from stem cell to  
872 terminally differentiated cell type.

873 **Figure 6: PLANA was used to create web-based resources for *Smed***

874 **embryogenesis.** A) Overview of didactic tools for *Smed* embryogenesis that rely upon  
875 PLANA for organization and presentation of the data. B) Staging Resource overview.  
876 Webpage for ‘Stage 6’ PLANA:0000006 displays PLANA metadata and the Ontology  
877 Graph visualization tool. (C) Whole-mount *in situ* hybridization data was annotated and  
878 organized using PLANA classes.

879

880 **Figure 7: Planarian Anatomy Gene Expression Database.**

881 (A) The PAGE resource is accessible via the Planosphere website and returns a  
882 downloadable table for searches such as: find all transcripts annotated as expressed in  
883 anatomical structures contained in the head across all lifecycle stages, specimen type  
884 and evidence types. Search by transcript or publication not shown. (B) PAGE is  
885 incorporated into individual class webpages under the PAGE: Planarian Anatomy Gene  
886 Expression section. For example, the Cephalic Ganglia web page includes references,  
887 genes, and transcripts that are annotated as being expressed in an anatomical structure  
888 that is a cephalic ganglia.

Nowotarski et al.

**Table 1: Class Annotations**

| <b>Annotation</b>                          | <b>Methods for Content</b>                                                                                                                                                                       | <b>Required/Optional</b> |
|--------------------------------------------|--------------------------------------------------------------------------------------------------------------------------------------------------------------------------------------------------|--------------------------|
| <b>label</b>                               | The primary name for a new class. When more than one potential name for a class exists, both prevalence and accuracy are considered. Alternate names appear as synonyms.                         | required                 |
| <b>definition</b>                          | Succinct statements, supported by published literature, codifying descriptions and salient characteristics for a class. Definitions are written by domain experts (planarian biologists).        | required                 |
| <b>definition database cross-reference</b> | PMID or OCLC identification number for the first publication(s) that introduce and define the class. This information is located within the definition annotation.                               | required                 |
| <b>synonym</b>                             | Additional name(s) for a class. This field encompasses broad and exact synonyms, as well as colloquial synonyms.                                                                                 | optional                 |
| <b>database cross-reference</b>            | Database identification number(s) for classes imported from other ontologies, as well as identification numbers for publications from the literature search (Table S1) that reference the class. | optional                 |
| <b>depicted by</b>                         | Image representing the class. Images published previously must be available for use under open source agreements or used with permission.                                                        | optional                 |
| <b>comment (depicted by)</b>               | Legend that describes the image shown in the “depicted by” field. Located within the “depicted by” annotation.                                                                                   | optional                 |
| <b>comment</b>                             | Clarifying statement for the class outside of the definition.                                                                                                                                    | optional                 |
| <b>created by</b>                          | ORCID of author.                                                                                                                                                                                 | optional                 |

Nowotarski et al.

**Table 2: Object Property Relationship Terms**

| Object Property     | Realm                 | Transitive | Definition                                                                                     | Specific Rules for Use in PLANA                                                                                                                                                                                                                                                                                    | Example                                                                                                                                                      |
|---------------------|-----------------------|------------|------------------------------------------------------------------------------------------------|--------------------------------------------------------------------------------------------------------------------------------------------------------------------------------------------------------------------------------------------------------------------------------------------------------------------|--------------------------------------------------------------------------------------------------------------------------------------------------------------|
| <b>part of</b>      | scalar<br>categorical | Yes        | X <i>part of</i> Y where X is a more specific class and Y is a broader class                   | A core relation that holds between a part and its whole. Used in PLANA to assign cells, tissues, and organs to anatomical systems. Since these relationships are transitive, relationships are explicitly made spanning one level of anatomical organization: cell to tissue, tissue to organ, or organ to system. | 'pigment cup cell'<br>PLANA:0000031<br>part of 'optic cup'<br>PLANA:0000075                                                                                  |
| <b>contained in</b> | spatial               | No         | X <i>contained in</i> Y where X is a more specific class and Y is a broader body region class. | Assigns the spatial location of an anatomical entity to a region of the embryo, asexual adult, or adult hermaphrodite body plan. Since the <i>contained in</i> object property is not transitive, <i>contained in</i> is annotated for all cell types, tissues, and organs within an anatomical system.            | 'pigment cup cell'<br>PLANA:0000031<br>contained in<br>'anterior region'<br>PLANA:0000140  <br>'dorsal region'<br>PLANA:0000141  <br>'head'<br>PLANA:0000418 |

Nowotarski et al.

|                                   |         |                   |                                                                                                                                           |                                                                                                                                                                                                                                                |                                                                                                              |
|-----------------------------------|---------|-------------------|-------------------------------------------------------------------------------------------------------------------------------------------|------------------------------------------------------------------------------------------------------------------------------------------------------------------------------------------------------------------------------------------------|--------------------------------------------------------------------------------------------------------------|
| <b>anterior to</b>                | spatial | Yes               | X <i>anterior to</i> Y if X is further along the antero-posterior axis than Y, towards the head                                           | Defines relative positions of two classes along the anterior-posterior axis of the animal, where the anterior-most structure on the axis is the head tip and the posterior-most structure is the tail tip.                                     | 'head'<br>PLANA:0000418<br>anterior to<br>'prepharyngeal region'<br>PLANA:0000419                            |
| <b>posterior to</b>               | spatial | Yes               | X <i>posterior to</i> Y if X is further along the antero-posterior axis than Y, towards the tail.                                         | Defines relative positions of two classes along the anterior-posterior axis of the animal, where the anterior-most structure on the axis is the head tip and the posterior-most structure is the tail tip.                                     | 'prepharyngeal region'<br>PLANA:0000419<br>posterior to 'head'<br>PLANA:0000418                              |
| <b>adjacent to</b>                | spatial | No ;<br>Symmetric | X <i>adjacent to</i> Y if and only if X and Y share a boundary.                                                                           | Used at cell and tissue levels when more granular spatial information other than shared boundary is known. <b>Not</b> used to describe relationships like body regions adjacent to each other (see <i>anterior to</i> , <i>posterior to</i> ). | 'collecting duct'<br>PLANA:0000118<br>adjacent to 'distal tubule'<br>PLANA:0000053                           |
| <b>immediately superficial to</b> | spatial | No                | X <i>immediately superficial to</i> Y if X is further along the medio-lateral axis towards lateral than Y and X shares a boundary with Y. | Defines relative positions of two classes along the medial-lateral axis of the animal, where the lateral-most structure on the axis is the epidermis and the medial-most structure is likely the gut lumen.                                    | 'epidermis'<br>PLANA:0000034<br>immediately superficial to 'basal lamina of the epithelium'<br>PLANA:0001005 |

Nowotarski et al.

|                                         |               |     |                                                                                                                                                              |                                                                                                                                                                                                                                                           |                                                                                                         |
|-----------------------------------------|---------------|-----|--------------------------------------------------------------------------------------------------------------------------------------------------------------|-----------------------------------------------------------------------------------------------------------------------------------------------------------------------------------------------------------------------------------------------------------|---------------------------------------------------------------------------------------------------------|
| <b>immediately deep to</b>              | spatial       | No  | X immediately deep to Y if X is further along the medio-lateral axis towards medial than Y and X shares a boundary with Y.                                   | Defines relative positions of two classes along the medial-lateral axis of the animal, where the lateral-most structure on the axis is the epidermis and the medial-most structure is likely the gut lumen.                                               | 'basal lamina of the epithelium'<br>PLANA:0001005<br>immediately deep to 'epithelium'<br>PLANA:0001005' |
| <b>develops from</b>                    | developmental | Yes | X develops from Y if and only if either (a) X directly develops from Y or (b)there exists some Z such that X directly develops from Z and Z develops from Y. | Describes developmental provenance of cell, tissue, organ, and organism stage classes from other cell, tissue, organ and organism stage classes. <b>Not</b> used to describe production and manufacture of biochemicals and substances (see produced by). | 'neoblast'<br>PLANA:0000429<br>develops from 'blastomere'<br>PLANA: 0004517                             |
| <b>produced by</b>                      | process       | No  | X produced by Y if some process that occurs in X has output Y.                                                                                               | Describes manufacturing of any physical product that is not a cell, tissue or organ class by a cell, tissue or organ class. <b>Not</b> used to describe developmental provenance (see develops from).                                                     | 'mucus'<br>PLANA:0002059<br>produced by 'secretory cell'<br>PLANA:0000105                               |
| <b>existence starts during or after</b> | temporal      | No  | X existence starts during or after Y if time point X starts >= time point Y starts.                                                                          | Describes temporal provenance for any anatomical entity with respect to developmental stages.                                                                                                                                                             | 'blastomere'<br>PLANA:0004517<br>existence starts during or after 'Stage 1'<br>PLANA:0000001            |

Nowotarski et al.

|                                        |          |    |                                                                                                                |                                                                                                       |                                                                                                                                                                                                                   |
|----------------------------------------|----------|----|----------------------------------------------------------------------------------------------------------------|-------------------------------------------------------------------------------------------------------|-------------------------------------------------------------------------------------------------------------------------------------------------------------------------------------------------------------------|
| <b>existence overlaps</b>              | temporal | No | X existence overlaps Y if and only if either (a) the start of X is part of Y or (b) the end of X is part of Y. | Describes range of temporal existence for any anatomical entity with respect to developmental stages. | 'blastomere'<br>PLANA:0004517<br>existence overlaps<br>'Stage 1'<br>PLANA:0000001  <br>'Stage 2'<br>PLANA:0000002  <br>'Stage 3'<br>PLANA:0000003  <br>'Stage 4'<br>PLANA:0000004  <br>'Stage 5'<br>PLANA:0000005 |
| <b>existence ends during or before</b> | temporal | No | X existence ends during or before Y if time point X ends $\leq$ time point at which Y ends.                    | Describes temporal extinction for any anatomical entity with respect to developmental stages.         | 'blastomere'<br>PLANA:0004517<br>existence ends during or before<br>'Stage 5'<br>PLANA:0000005.                                                                                                                   |

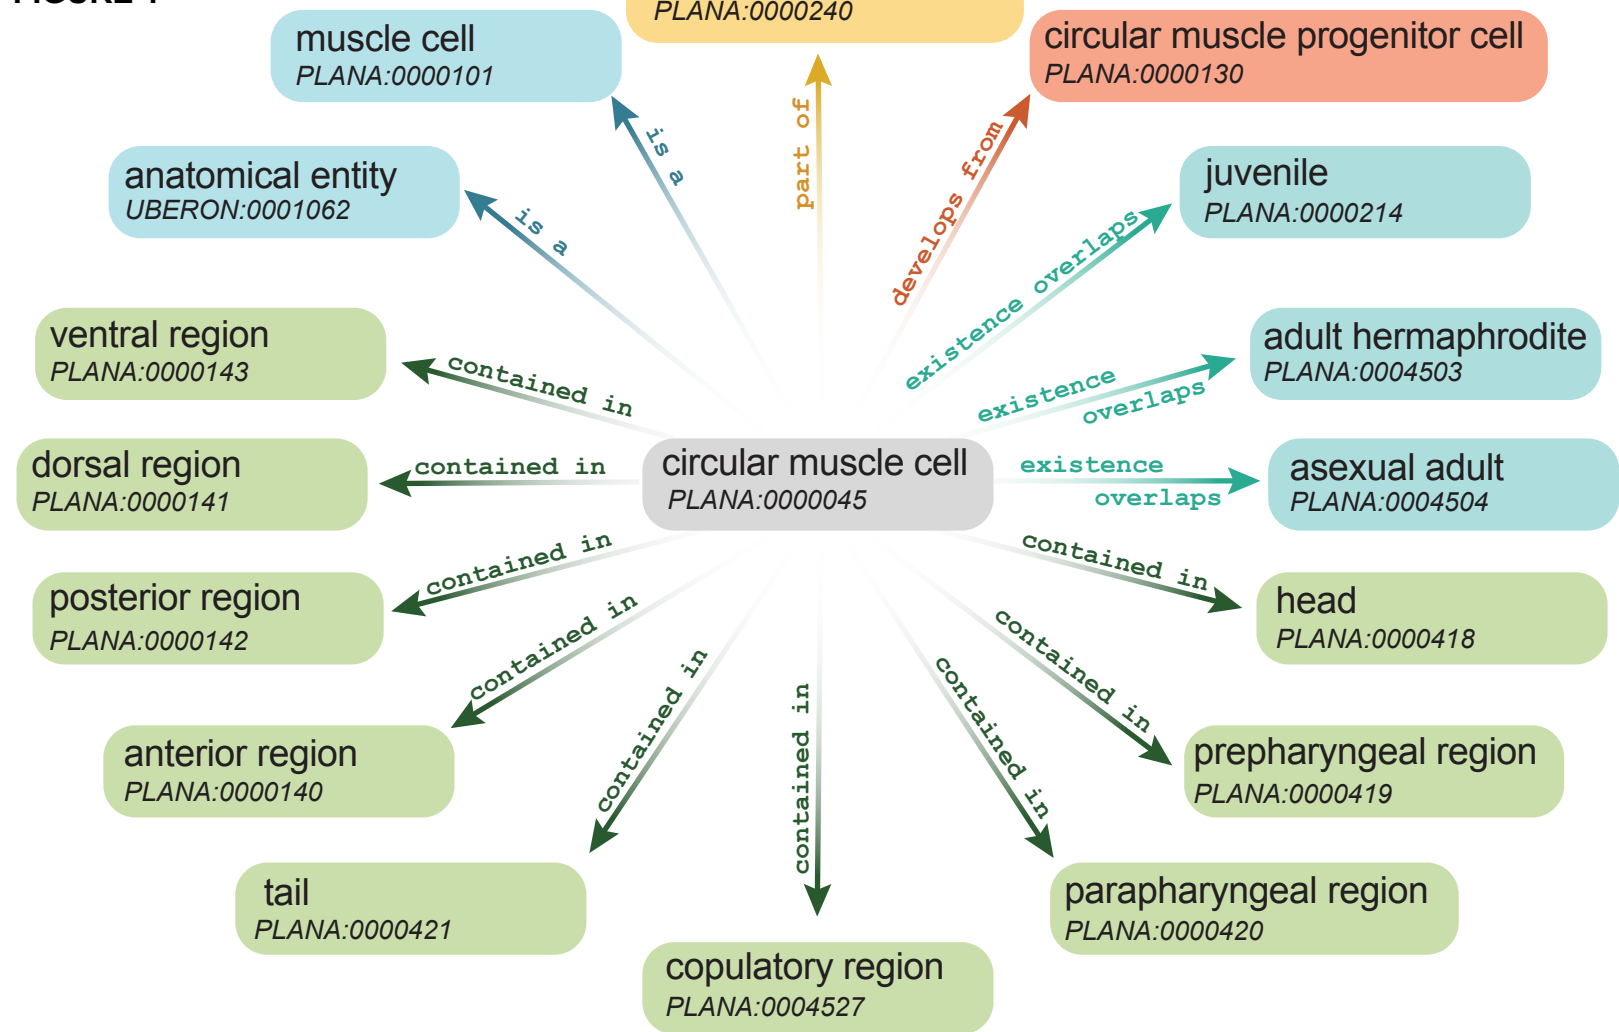

## FIGURE 2

A

**Class Label:** epidermis

**Class ID:** PLANA:0000034

**Synonyms:** definitive epidermis  
epidermal layer

**Definition:** A single cell layer of post-mitotic epithelial cells containing ciliated and non-ciliated cell types forming the exterior surface of the animal.

**Definition Database**

**Cross Reference:**

OCLC:16809160

**Comment:** At present, this definition does not apply to epithelial structures other than the dorsal and ventral epidermis

**Depicted by:**

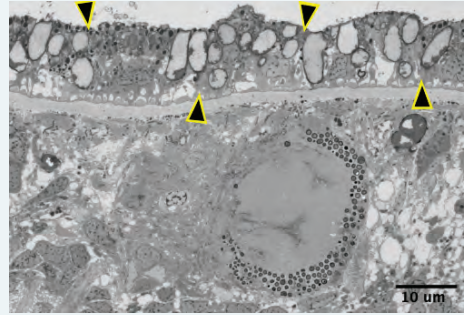

**Depicted by comment:**

Image is an electron micrograph depicting the dorsal epidermis (arrowheads). Also visible in this micrograph, immediately deep to the epidermis is the basal lamina and beneath that is a photoreceptor. Scale bar is 10 μm.

**Database Cross References:** PMID:15866156, PMID:16311336  
PMID:18786419, PMID:19048075, PMID:19247960, PMID:19852954,  
PMID:20215344, PMID:20511647...

B

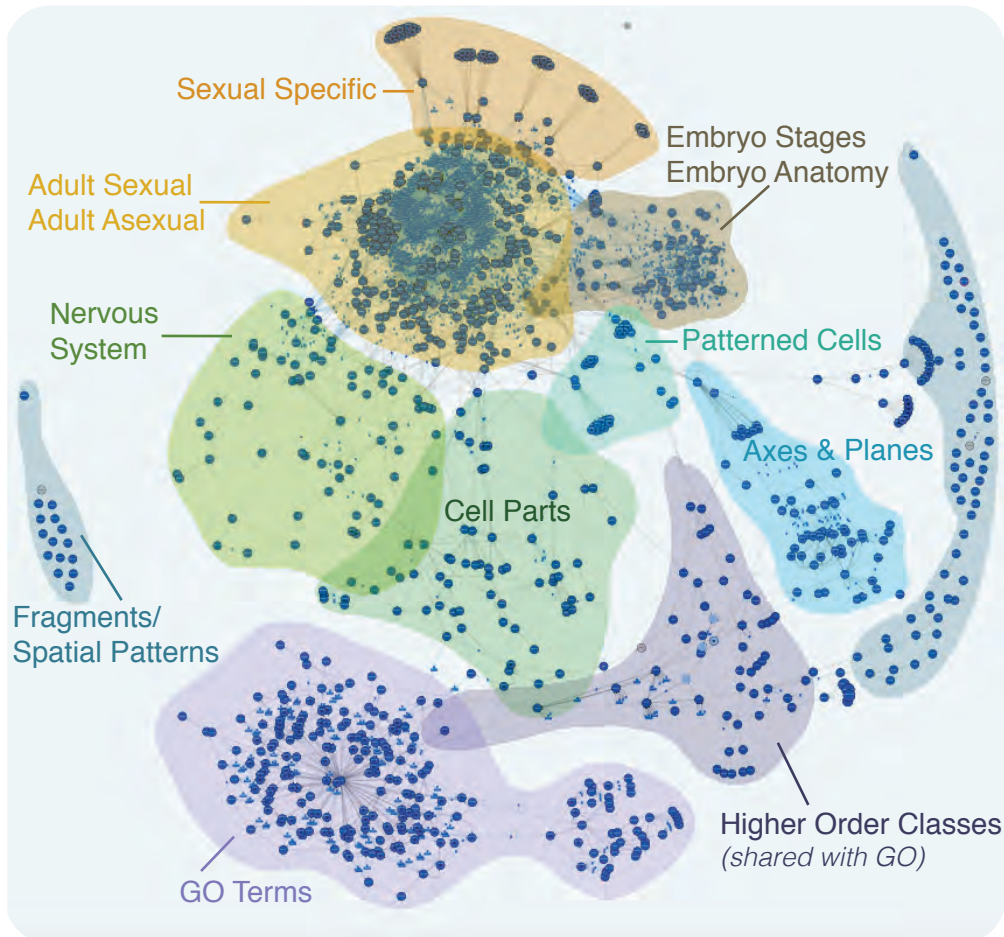



FIGURE 3

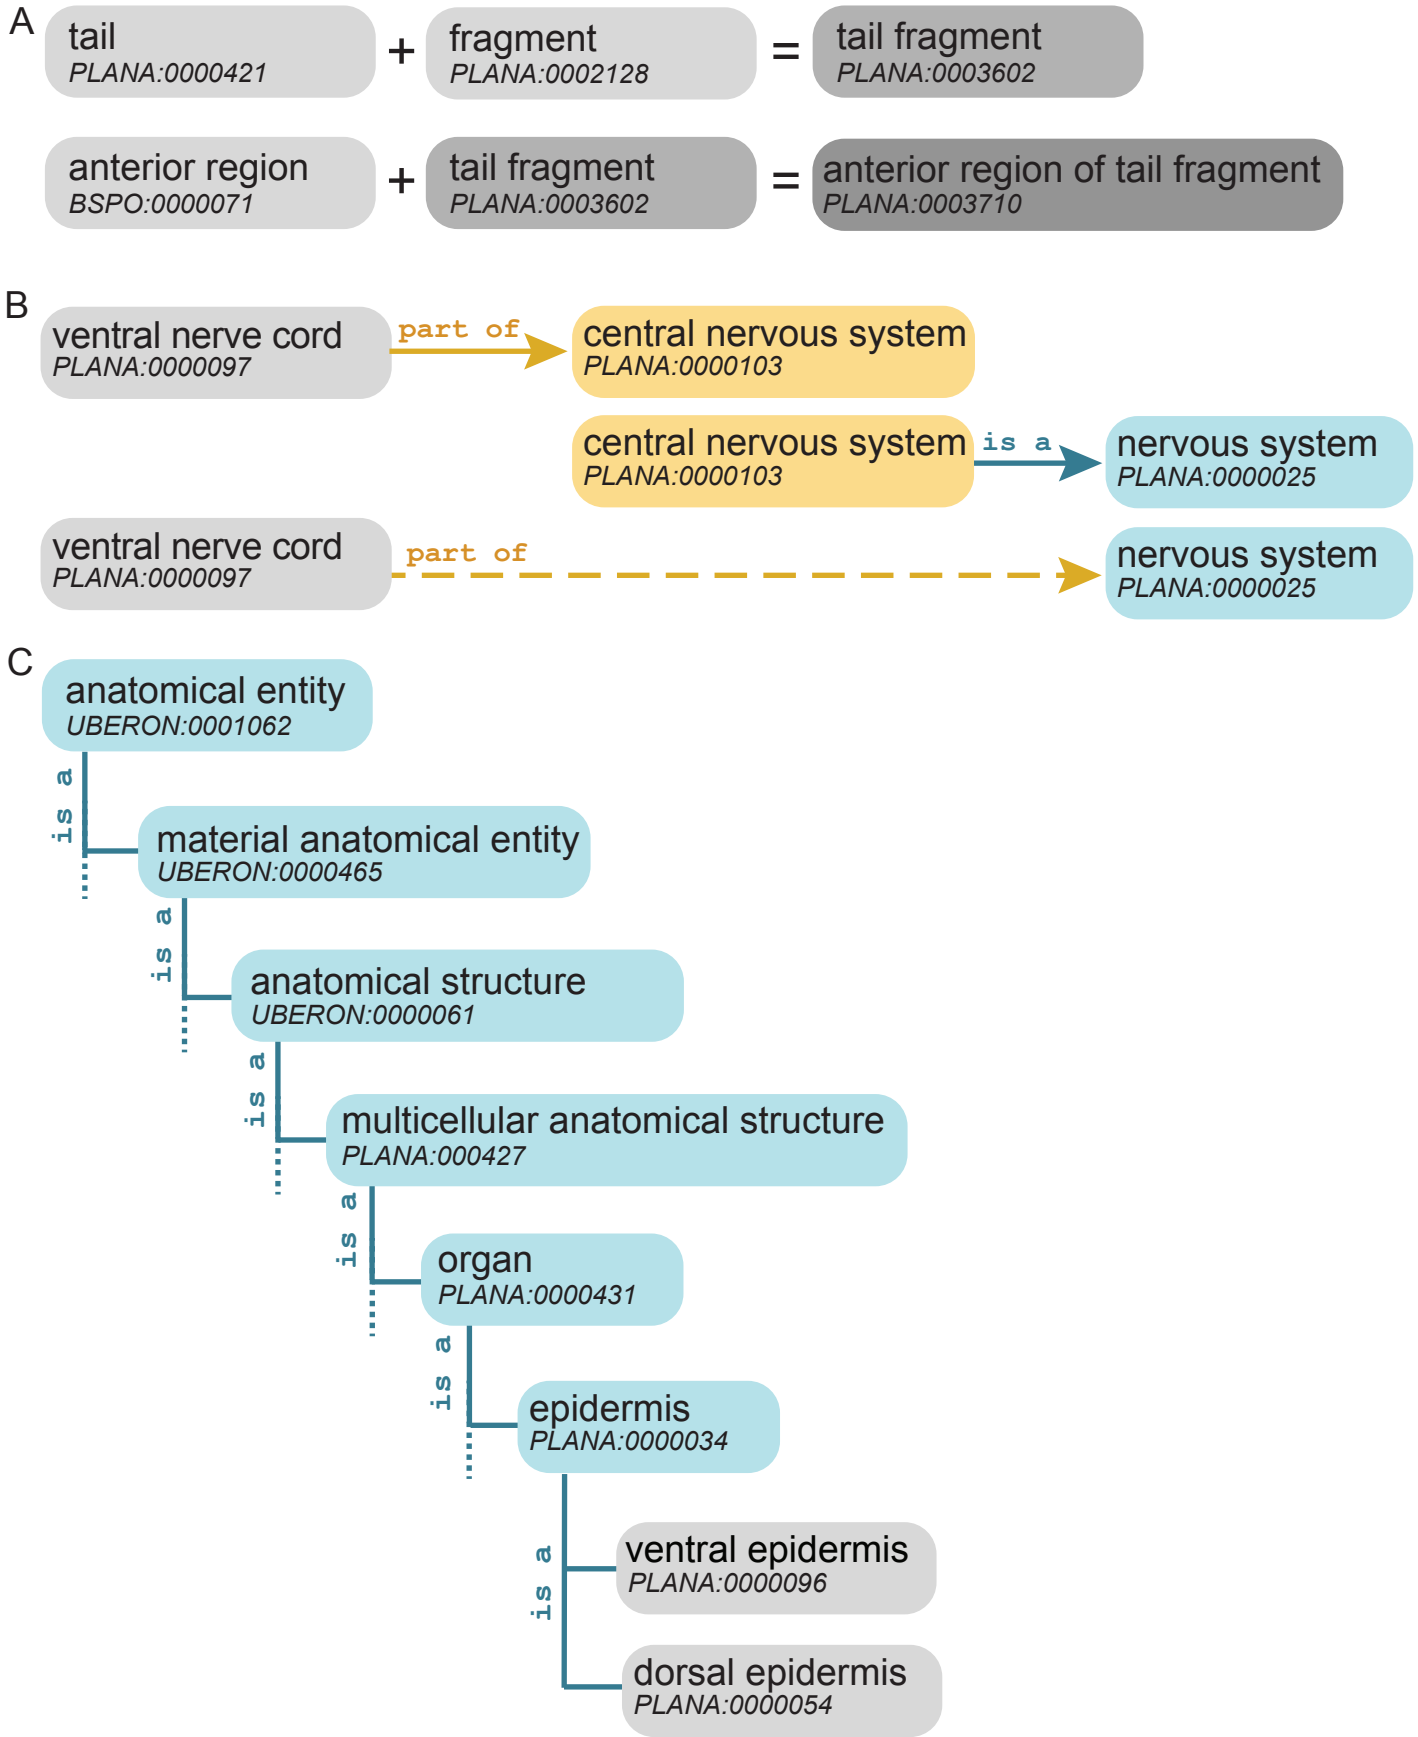

**FIGURE 4**

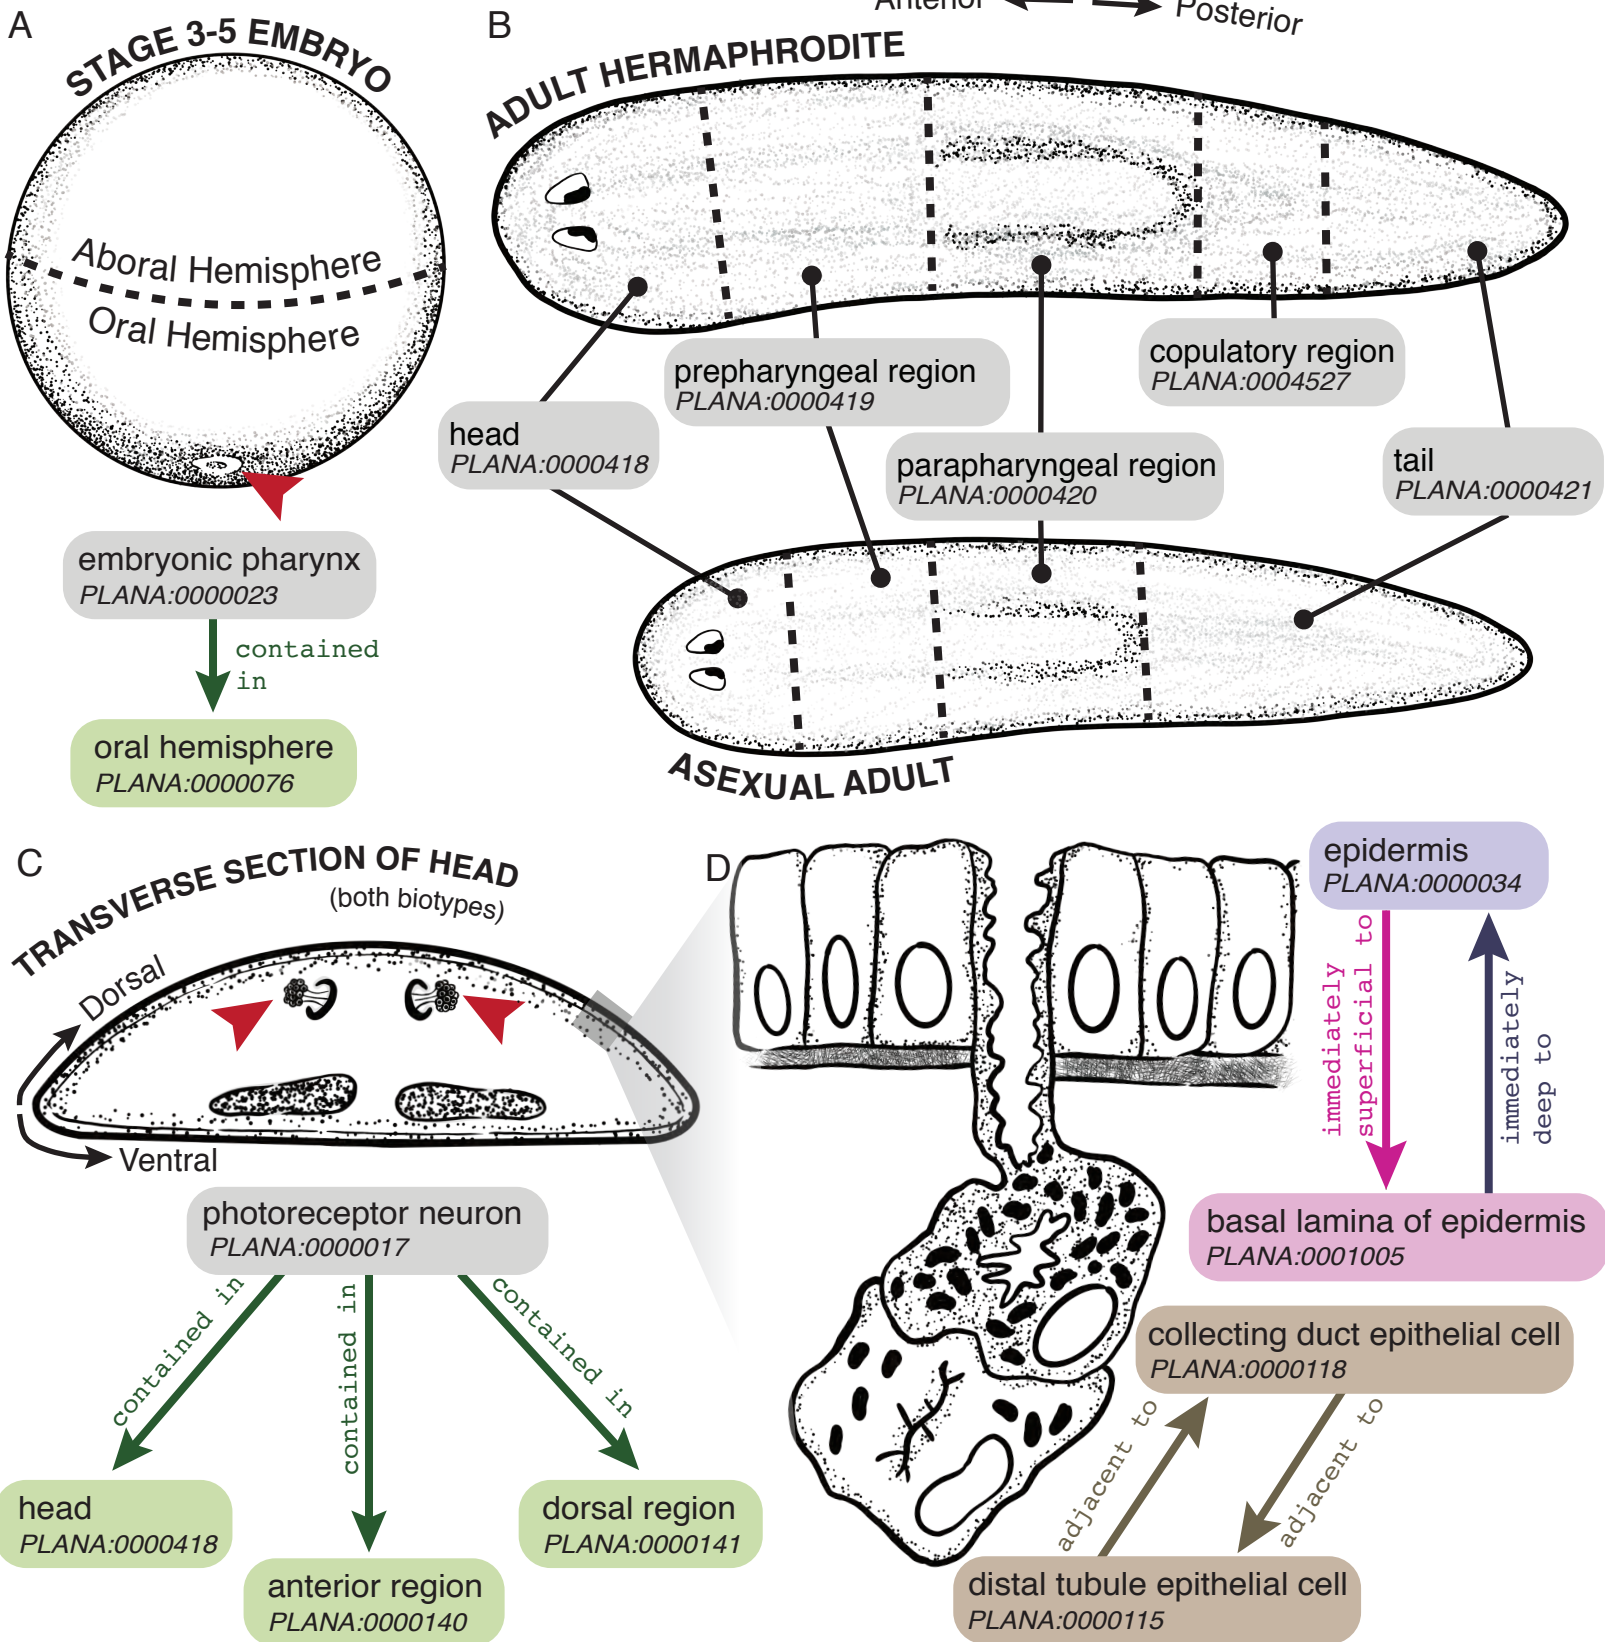

Nowotarski et al.

FIGURE 5

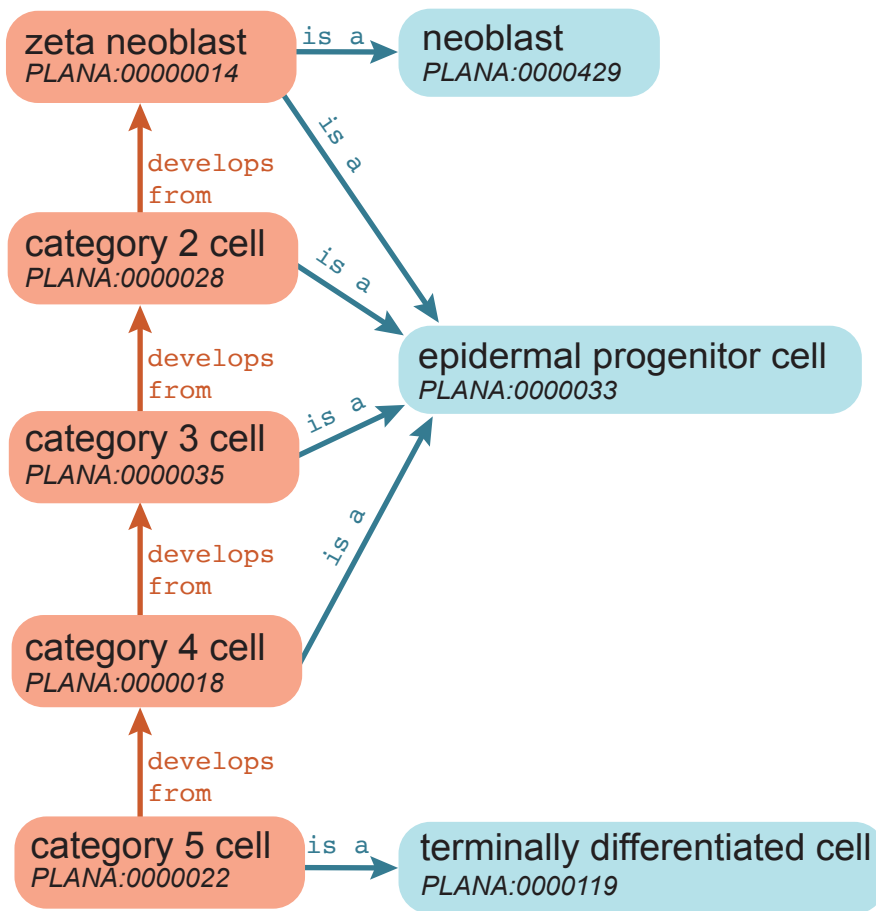

A

bioRxiv preprint doi: <https://doi.org/10.1101/2020.08.14.251579>; this version posted August 14, 2020. The copyright holder for this preprint (which was not certified by peer review) is the author/funder, who has granted bioRxiv a license to display the preprint in perpetuity. It is made available under aCC-BY-NC 4.0 International license.



**STAGE 6**

- ▾ Planarian Anatomy Ontology Class Overview
- ▾ Additional Class Information
- ▾ Description
- ▾ Figures
- ▾ In Situ Hybridization Data
- ▾ Sequences
- ▾ Download Supplemental Table

B

**Planarian Anatomy Ontology Class Overview**

For more information about the ontology visit [PLANA Overview](#).

**Stage 6**

**DEFINITION:**  
A stage of Smed embryonic development defined by a unique gene expression signature and morphology, 7 - 9 days post-egg capsule deposition at 20°C. Organogenesis and morphogenesis. Definitive organ formation. Temporary embryonic cell types degenerate. Embryo elongation.

**TERM DEFINITION CITATIONS:**  
PMID:28072387

**TERM CITATIONS:**  
Expand publication list

**TERM ID:**  
PLANA:0000006

**ABOUT THIS TERM:**  
Stage 6  
↳ is a embryo stage

- Expand to see terms that **existence ends during or before** Stage 6
- Expand to see terms that **existence overlaps** Stage 6
- Expand to see terms that **existence starts during or after** Stage 6

**DEPICTED BY:**



**COMMENTS:**  
Image above is an H+E section of a stage 6 embryo. Scale bar = 100um

**ONTOLOGY GRAPH:**

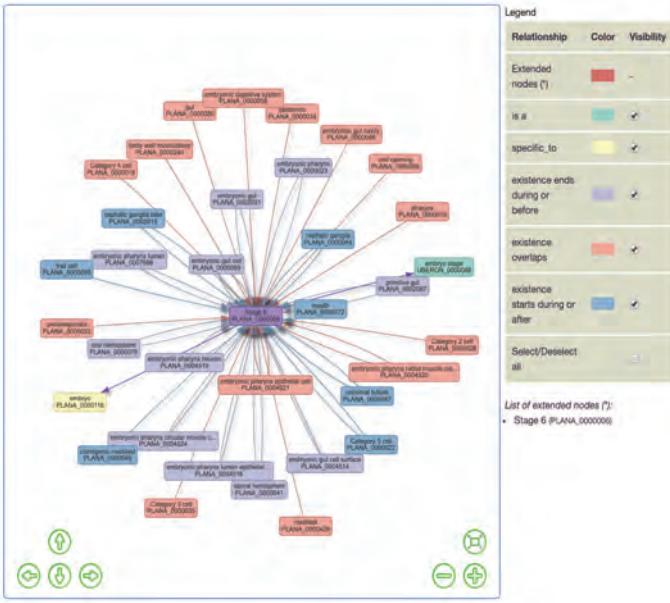

**C In Situ Hybridization Data**

| Smed ID      | Accession | Name                 | Alias     | Expressed during stage(s)                                     | Tissue/Pattern                                                                        | Images                                                                               |
|--------------|-----------|----------------------|-----------|---------------------------------------------------------------|---------------------------------------------------------------------------------------|--------------------------------------------------------------------------------------|
| SMED30001900 |           | Bruno-like protein   | bruli-1   | Stage 2, Stage 3, Stage 4, Stage 5, Stage 6, Stage 7, Stage 8 | neoblast, blastomere                                                                  | 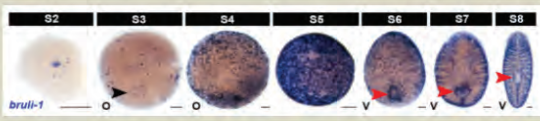 |
| SMED30021661 |           | Carbonic anhydrase 7 | CAVII-1   | Stage 6, Stage 7, Stage 8                                     | distal tubule, protonephridia, renal system                                           |  |
| SMED30023322 |           | Cathepsin L          | CTSL-like | Stage 2, Stage 3, Stage 4, Stage 5, Stage 6                   | embryonic digestive system, embryonic gut cell, primitive gut cell, embryonic pharynx |  |

Figure 7

A

**PLANOSPHERE** PUBLICATIONS

**PLANARIAN ANATOMY GENE EXPRESSION: SEARCH BY TERM**

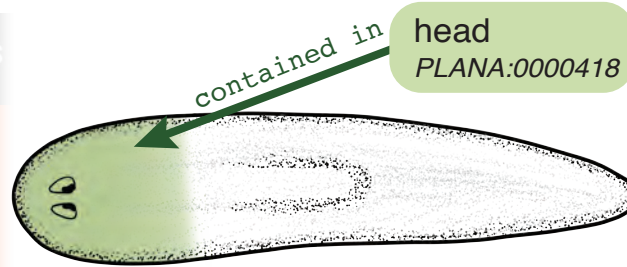

**Search Details:**  
 Result count: 20956  
 Search term: head  
 Search type: contained\_in  
 Specimen type: any  
 Lifecycle type: any  
 Evidence type: any

| contained_in head | Reference Transcript | Gene Models      | Published Transcript | Transcriptome      | Publication   | Specimen                    | Lifecycle     | Evidence                           |
|-------------------|----------------------|------------------|----------------------|--------------------|---------------|-----------------------------|---------------|------------------------------------|
| epidermis         | SMED30008461         | SMESG000071994.1 | dd_Smedv4_10823_0_1  | dd_Smed_v4         | PMID:28292427 | whole organism              | asexual adult | single-cell RNA-sequencing         |
| optic cup         | SMED30015071         | SMESG000001561.1 | SMED30015071         | smed_20140614      | PMID:21852957 | whole organism              | asexual adult | fluorescence in situ hybridization |
| gut               | SMED30025591         | SMESG000051516.1 | EU130791.1           | smed_ncbi_20200123 | PMID:28072387 | whole organism              | stage 7       | colorimetric in situ hybridization |
| neoblast          | SMED30026732         | SMESG000002076.1 | dd_Smed_v6_849_0     | dd_Smed_v6         | PMID:29674432 | FACS sorted cell population | asexual adult | single-cell RNA-sequencing         |

B

**PLANOSPHERE** PUBLICATIONS

**CEPHALIC GANGLIA**

- Planarian Anatomy Ontology Class Overview
- Embryonic Molecular Fate Mapping
- In Situ Hybridization Data
- Sequences
- PAGE: Planarian Anatomy Gene Expression

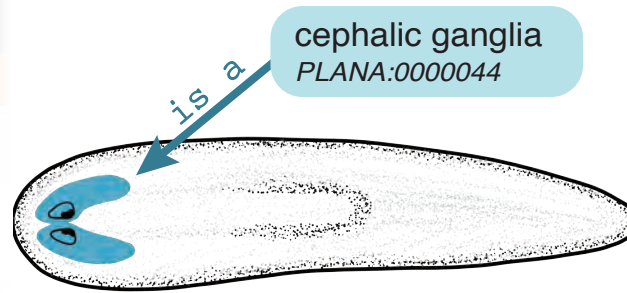

**Search Details:**  
 Result count: 251  
 Search term: cephalic ganglia  
 Search type: is\_a  
 Specimen type: any  
 Lifecycle type: any  
 Evidence type: any

| Anatomy          | Reference Transcript | Gene Models      | Published Transcript | Transcriptome      | Publication   | Specimen       | Lifecycle           | Evidence                           |
|------------------|----------------------|------------------|----------------------|--------------------|---------------|----------------|---------------------|------------------------------------|
| cephalic ganglia | SMED30008848         | SMESG000080685.1 | BK007034             | smed_ncbi_20200123 | PMID:20967238 | whole organism | adult hermaphrodite | colorimetric in situ hybridization |
| cephalic ganglia | SMED30023062         | SMESG000021009.1 | DQ344977             | smed_ncbi_20200123 | PMID:16890156 | whole organism | asexual adult       | fluorescence in situ hybridization |
